# 1 **Detection of fusion transcripts and their genomic** 2 **breakpoints from RNA sequencing data**

3 Youri Hoogstrate<sup>1,2,\*</sup>, Malgorzata A. Komor<sup>3</sup>, René Böttcher<sup>1,4</sup>, Job van Riet<sup>5</sup>, Harmen J. G. van de Werken<sup>1,6</sup>,  
4 Stef van Lieshout<sup>7</sup>, Ralf Hoffmann<sup>8</sup>, Evert van den Broek<sup>3,9</sup>, Anne S. Boliijn<sup>3</sup>, Natasja Dits<sup>1</sup>, Daoud Sie<sup>3</sup>,  
5 David van der Meer<sup>11</sup>, Floor Pepers<sup>11</sup>, Chris H. Bangma<sup>1</sup>, Geert J. L. H. van Leenders<sup>10</sup>, Marcel Smid<sup>5</sup>, Pim  
6 French<sup>2</sup>, John W.M. Martens<sup>5</sup>, Wilbert van Workum<sup>14</sup>, Peter J. van der Spek<sup>10</sup>, Bart Janssen<sup>11</sup>, Eric  
7 Caldenhoven<sup>12</sup>, Christian Rausch<sup>13</sup>, Mark de Jong<sup>15</sup>, Andrew P. Stubbs<sup>10</sup>, Gerrit A. Meijer<sup>3</sup>, Remond J.A.  
8 Fijneman<sup>3</sup> and Guido Jenster<sup>1</sup>

9 <sup>1</sup> Department of Urology, Erasmus Medical Center, Rotterdam, 3015GD, The Netherlands

10 <sup>2</sup> Department of Neurology, Erasmus Medical Center, Rotterdam, 3015GD, The Netherlands

11 <sup>3</sup> Department of Pathology, Netherlands Cancer Institute, Amsterdam, 3015GD, The Netherlands

12 <sup>4</sup> Department of Life Sciences, Barcelona Supercomputing Center, Barcelona, 08034, Spain

13 <sup>5</sup> Department of Medical Oncology, Erasmus Medical Center, Rotterdam, 3015GD, The Netherlands

14 <sup>6</sup> Cancer Computational Biology Center, Erasmus Medical Center, Rotterdam, 3015GD, The Netherlands

15 <sup>7</sup> Hartwig Medical Foundation, Amsterdam, 1098XH, The Netherlands

16 <sup>8</sup> Philips Research, Eindhoven, 5656AE, The Netherlands

17 <sup>9</sup> Department of Pathology and Medical Biology, University Medical Center Groningen, Groningen, 9713GZ, The  
18 Netherlands

19 <sup>10</sup> Department of Pathology, Erasmus Medical Center, Rotterdam, 3015GD, The Netherlands

20 <sup>11</sup> GenomeScan, Leiden, 2333BZ, The Netherlands

21 <sup>12</sup> Lygature, Utrecht, 3521AL, The Netherlands

22 <sup>13</sup> BioLizard N.V., Ghent, 9000, Belgium

23 <sup>14</sup> Limes Innovations, The Netherlands

24 <sup>15</sup> VHLGenetics, Wageningen, 6708PW, The Netherlands

25 \* Correspondence: [y.hoogstrate@erasmusmc.nl](mailto:y.hoogstrate@erasmusmc.nl)

## 26 **Abstract**

27 Spliced fusion-transcripts are typically identified by RNA-seq without elucidating the causal genomic  
28 breakpoints. However, non poly(A)-enriched RNA-seq contains large proportions of intronic reads  
29 spanning also genomic breakpoints. Using 1.274 RNA-seq samples, we investigated what additional  
30 information is embedded in non poly(A)-enriched RNA-seq data. Here, we present our novel, graph-based,  
31 Dr. Disco algorithm that makes use of both intronic and exonic RNA-seq reads to identify not only fusion  
32 transcripts but also genomic breakpoints in gene but also in intergenic regions. Dr. Disco identified  
33 Tmprss2-ERG fusions with genomic breakpoints and other transcribed rearrangements from multiple  
34 RNA-sequencing cohorts. In breast cancer and glioma samples Dr. Disco identified rearrangement  
35 hotspots near CCND1 and MDM2 and could directly associate this with increased expression. A  
36 comparison with matched DNA-sequencing revealed that most genomic breakpoints are not, or minimally,  
37 transcribed while also revealing highly expressed translocations missed by DNA-seq. By using the full  
38 potential of non poly(A)-enriched RNA-seq data, Dr. Disco can reliably identify expressed genomic  
39 breakpoints and their transcriptional effects.

40 **Keywords:** Gene Fusion, RNA Precursors, RNA-Seq, Chromosome Breakage, Genomic Structural  
41 Variation, Tmprss2-ERG

## 42 Introduction

43 Genomic rearrangements are frequently observed in cancer and these can drive disease initiation and  
44 progression through disruption of tumour suppressor genes and activation of oncogenes <sup>1-3</sup>. Marked  
45 examples include *TMPRSS2-ERG* fusions in prostate adenocarcinoma <sup>4</sup> and *BCR-ABL* in chronic  
46 myelogenous leukaemia <sup>5</sup>. DNA breakpoints and their aberrant ligations are identified by whole genome  
47 sequencing (WGS) but their potential role as driver mutations is mostly unresolved as-of-yet. The  
48 majority of DNA breakpoints involve intergenic and intronic regions and thus not part of messenger RNA  
49 (mRNA) and protein coding sequences <sup>6</sup> and genomic breakpoints of fusion genes are mostly located  
50 intronic <sup>7</sup>. To reveal their downstream effects, RNA-sequencing (RNA-seq) is crucial to investigate  
51 changes at the transcriptional level and identify actual (in-frame) fusion transcripts. Conversely, for  
52 fusion-transcripts, identification of the exact genomic breakpoint(s) can be essential to explain changes in  
53 gene expression and to define the origins of alternative promoter usage and altered splicing or  
54 polyadenylation events. Combined genomic and expression data allows to further study functional  
55 consequences of genomic rearrangements and signifies whether the event is merely a passenger or a  
56 putative driver mutation <sup>7,8</sup>. However, for many transcriptome studies, the exact genomic breakpoints of  
57 expressed rearrangements have not been resolved as matched WGS, Sanger sequencing, or similar  
58 analyses were not performed. Therefore, we set out to determine whether exact genomic breakpoints  
59 could be identified from RNA-seq data.

60 Next to targeted gene approaches, there are two main approaches in preparing RNA-seq libraries <sup>9</sup>. First,  
61 the more traditional method includes the positive selection of poly-adenylated messenger RNA (mRNA;  
62 poly(A)<sup>+</sup>) to specifically target mRNA and eliminate abundant ribosomal RNA (rRNA). Alternatively, one  
63 may extract total RNA and use random hexamer primers to initiate cDNA synthesis while removing  
64 abundant unwanted RNAs by various additional methods. This approach is referred to as rRNA-minus  
65 and is commonly applied when (partially) degraded RNA from formalin-fixed paraffin-embedded (FFPE)  
66 samples are sequenced.

67 rRNA-minus RNA-seq is thus capable of identifying non-poly(A) transcripts such as circRNAs, specific  
68 types of small and long non-coding RNAs and actively-transcribed precursor mRNAs (pre-mRNAs) <sup>10</sup>.  
69 Although the exact numbers depend on the used protocol, tissue type, lariats <sup>11</sup> and intron lengths,  
70 typically 30-40% of rRNA-minus RNA-seq reads map to intronic features compared with 5-10% in  
71 poly(A)<sup>+</sup> RNA-seq <sup>12</sup>. Therefore, rRNA-minus RNA-seq datasets require at least 50% higher sequencing  
72 depth to achieve a similar exon coverage comparable to poly(A)<sup>+</sup> RNA-seq, while being capable of  
73 identifying additional RNA classes <sup>9</sup>.

74 Fusion genes such as *TMPRSS2-ERG* and *BCL-ABL* are frequently observed as drivers within their  
75 respective malignant tissue <sup>13</sup>. Yet, many observed fusion genes are still of unknown consequence and  
76 seen in small frequencies in various cancer types. RNA-seq is highly suitable for fusion gene detection <sup>14-</sup>  
77 <sup>16</sup>. Methods to integrate RNA and DNA fusions and breakpoints allow to further assess functional

78 consequences <sup>7,8,17</sup>, and are even capable of integrating higher order complex rearrangements, but remain  
79 dependent on the availability of matching DNA data. Current fusion-detection tools such as FusionMap,  
80 FusionCatcher and JAFFA focus on exon regions or splice junctions <sup>18-20</sup> which are the main target of  
81 poly(A)<sup>+</sup> RNA-seq. Indeed, these tools also work well on rRNA-minus RNA-seq as these also include  
82 exonic reads. This efficient search space reduction in classical fusion gene detectors in turn reduces the  
83 overall complexity and processing time. However, using rRNA-minus RNA-seq, typically 30-40% of the  
84 aligned reads are intronic and a further 20-25% of all reads are found to be intergenic <sup>12</sup>, which are often  
85 a priori neglected. This large number of intronic and intergenic reads provides an opportunity to identify  
86 additional cancer specific transcripts and the exact genomic breakpoints of fusion genes. We have  
87 previously shown in a proof-of-concept that rRNA-minus RNA-seq can identify genomic breakpoints <sup>10</sup>.  
88 Here, we present an algorithm named Dr. Disco (<https://github.com/yhoogstrate/dr-disco>) which  
89 computationally identifies such genomic breakpoints and exon-to-exon junctions in a genome-wide  
90 fashion, taking into account the potential of rRNA-minus RNA-seq. We applied Dr. Disco on five large  
91 RNA-seq datasets spanning multiple malignant tissues (n=1.274) (**Table 1**). Indeed, we reveal exact  
92 causal genomic breakpoints as derived from RNA-sequencing alone but limited to regions sufficiently  
93 expressed. Furthermore, we show that rRNA-minus RNA-seq data can reveal more transcriptionally  
94 active rearrangements than poly(A)<sup>+</sup> RNA-seq and therefore is a useful analysis to supplement WGS. Thus,  
95 rRNA-minus RNA-seq in combination with a suited analysis pipeline gives a more complete view on both  
96 the origin and effects of genomic rearrangements and their direct influence on the expression of  
97 associated genes.

## 98 **Results**

99 To identify exact genomic breakpoints from rRNA-minus RNA-seq, we developed a novel algorithm and  
100 implemented this in Python, termed Dr. Disco. The tool uses discordant reads <sup>21</sup>, reads with a split  
101 alignment or read pairs with an inverted or large insert size. The method uses reads from not only exonic  
102 but also intronic and intergenic regions (**Figure 1** and **Supplementary Dr. Disco technical**  
103 **specification**). These split and spanning reads are converted and inserted into a breakpoint graph <sup>7</sup>. The  
104 graph is analysed to find reads originating from the same junctions.

105 For terminology, we define exon-to-exon splice junctions as junctions of which it may be expected that  
106 they could be detected by classical fusion detection algorithms. Fusion transcripts which are not a result  
107 of (cryptic-)exon-to-exon splicing are typically intron-to-intron junctions located exactly at genomic  
108 breakpoints. In addition, it is possible that genomic breakpoints are located within exons and do not  
109 result in fused spliced junctions (**Figure S1**). Because these junctions do not match splice junctions and  
110 are not the primary target of classical fusion gene detection, we also consider them intronic.  
111 Corresponding detected junctions are marked exonic or intronic accordingly. The detailed computational  
112 methodology is described in **Supplementary Methods** and the **Supplementary Dr. Disco technical**  
113 **specification**.

## 115 **Comparison poly(A)<sup>+</sup> and rRNA-minus RNA-seq**

116 To determine the overlap of genomic breakpoints as detected from DNA-seq with those detected from  
117 RNA-seq using Dr. Disco, seven prostate cancer (PCa) samples (PCa-LINES dataset) were sequenced using  
118 the Complete Genomics WGS platform and with matching poly(A)<sup>+</sup> and rRNA-minus RNA-seq. After  
119 filtering out the exon-exon junctions, we found that rRNA-minus RNA-seq identified more (3.4 times)  
120 intronic junctions, thus predicted genomic breakpoints, between chromosomes as compared to poly(A)<sup>+</sup>  
121 RNA-seq (**Figure 2A**). Although poly(A)<sup>+</sup> RNA-seq also harbours genomic breakpoints, they are less  
122 confidently called as they have fewer read counts and mostly lie in 3' UTR terminal exons as in-exon  
123 located genomic breakpoints (**Figure S2**). Terminal exons are known for their relatively large size as they  
124 are approximately 6-7 times larger than internal exons <sup>22</sup>. The number of exonic junctions, thus predicted  
125 mRNA fusions, identified by Dr. Disco is nearly identical for rRNA-minus and poly(A)<sup>+</sup> RNA-seq (144 vs  
126 155). Of the exonic junctions detected in rRNA-minus samples, 52% were also found in the poly(A)<sup>+</sup> data.  
127 However, another 26% also matched the poly(A)<sup>+</sup> data but did not pass filtering, mostly because of  
128 insufficient discordant reads.

## 129 **Comparison of RNA- with DNA-seq data**

130 Within these 7 PCa samples, the number of genomic breakpoints identified in WGS vastly outnumbered  
131 those extracted from the rRNA-minus RNA-seq (6.8%), indicating that only a fraction of the genomic  
132 rearrangements is expressed at a level to be detected by rRNA-minus RNA-seq. The intronic and exonic  
133 junctions as detected by rRNA-minus RNA-seq show overlap with the genomic breakpoints detected by  
134 WGS (**Figure S3**). Interestingly, 27 interchromosomal genomic breakpoints were only found by RNA-seq;  
135 6 genomic breakpoints by poly(A)<sup>+</sup> only, 17 by rRNA-minus only and 4 by both RNA sequencing methods  
136 (**Table S1**).

137 To identify the influence of sequencing coverage and read length on the number of intronic and exonic  
138 junctions, 4 breast cancer (BrCa) RNA-seq samples from the BASIS dataset <sup>23,24</sup> were systematically  
139 truncated (**Figure 2B**). The number of detected junctions dropped as sequencing reads became shorter,  
140 showing that a minimum length of 55 bases is necessary for accurate detection using Dr. Disco. We  
141 noticed an increase in discordantly-aligned reads when they were truncated to 50bp. This was due to an  
142 overall increase in misalignments that do not resemble actual evidence of genomic rearrangements.  
143 Irrespective of the number of genomic breakpoints present within a sample as determined by WGS, an  
144 increase in overall sequencing depth is positively correlated with an increase in detected junctions  
145 (**Figure 2B**).

146 Genomic breakpoints detected by WGS from 207 BrCa samples from the BASIS dataset <sup>23,24</sup> were  
147 compared to their matching rRNA-minus RNA-seq detected junctions. Only interchromosomal entries  
148 were compared to avoid fusion transcripts unrelated to genomic rearrangements such as read-throughs

149 or circRNAs. WGS identified a total of 6531 interchromosomal genomic breakpoints and, similar to the  
150 seven prostate cancer samples, the majority of the genomic breakpoints were not detectable in the  
151 matching RNA-seq. Only 409 events (6.3%) were found in both assays, a similar percentage compared  
152 with our analysis on PCa samples (**Figure 3A**). Dr. Disco detected 377 unique genomic breakpoints (48%)  
153 which were only present within the RNA-seq data, of which 109 of these genomic breakpoints were  
154 identified within eight BrCa samples which also had an overall high number of (WGS-detected) genomic  
155 breakpoints (**Figure S4**). The density of WGS and RNA-seq detected junctions was highly similar ( $R^2=0.72$ ,  
156 **Figure 3B**, BrCa plots; **Figures S5-S7**), with prominent focal peaks near the genomic locus of *CCND1*,  
157 *SHANK2* and *FGFR1*.

## 158 **Pan-cancer analysis**

159 We analysed rRNA-minus RNA-seq data (n=651) from different malignant tissues and datasets using the  
160 Dr. Disco algorithm (**Figures 3B & 4**). This included the earlier described BrCa dataset BASIS (n=207),  
161 NGS-ProToCol (normal adjacent prostate; n=41, prostate cancer; n=51; normal adjacent colon; n=18,  
162 colorectal adenoma; n=30 and colorectal carcinoma; n=30) and the Chinese glioma atlas (CGGA) (various  
163 glioma types; n=274) (**Table 1**).

164 Intronic and exonic junctions were identified in each dataset. The different malignant tissue types showed  
165 distinct regions enriched with intronic and exonic junctions, as represented in a chromosome plot  
166 (**Figure 3B**). Known prominent events include *TMPRSS2-ERG* (chr21) in PCa, *EGFR* (chr7) in glioma and  
167 *CCND1* rearrangements (chr11) in BrCa. The number of breakpoints per sample with associated clinical  
168 parameters is provided in **Figure 4**. The lowest average number of genomic breakpoints per tissue type  
169 was found in normal adjacent samples (colon=0.5; prostate=0.9) followed by colorectal adenoma (1.1)  
170 (**Figures S8-S9**). The *TMPRSS2-ERG* fusion-event was observed in two normal adjacent prostate samples  
171 containing genomic breakpoints exactly identical to their matching malignant sample and were therefore  
172 contaminated with cancer cells (**Figure S8B**). Of the different malignant tissue types, colorectal cancer  
173 samples were characterized by the lowest average number of junctions (1.1) followed by combined low-  
174 and high-grade glioma (2.1) (**Figure S10**). Conversely, PCa (4.3) and BrCa (9.3) were characterized by  
175 relatively high numbers of genomic breakpoints per sample. Absolute numbers were used since not only  
176 sequencing depth but also read depth and library preparation differ per dataset.

177 Several clinical parameters were associated with the number of Dr. Disco-detected genomic breakpoints  
178 per sample (**Figure 4**). In BrCa, kataegis ( $p=1.9e^{-09}$ ) was positively associated with the number of  
179 observed genomic breakpoints whereas ER+ BrCa revealed to be negatively associated ( $p=0.9e^{-03}$ ) with  
180 the number of genomic breakpoints. In glioma, tumour grade IV is positively associated with the number  
181 of genomic breakpoints per sample ( $p=1.1e^{-05}$ ), whereas tumour grade II ( $p=2.9e^{-08}$ ) and presence of an  
182 IDH1 mutation ( $p=0.8e^{-03}$ ) were negatively associated. The number of intronic junctions detected by Dr.  
183 Disco on RNA-seq correlates positively with the number of WGS-detected genomic breakpoints within  
184 BrCa ( $\rho=0.71$ ,  $p=2.2e^{-16}$ , **Figure S11**). Although trends within PCa were observed for the incidence of high

185 Gleason grade ( $\geq 8$ ;  $p=0.08$ ;  $n=4/50$ ) and metastasis ( $p=0.16$ ;  $n=8/51$ ) associated with the number of  
186 genomic breakpoints, it did not reach statistical significance. Because of the relative low number of  
187 genomic breakpoints per sample and the rather low number of colorectal cancer samples, further in-  
188 depth analysis on recurrent events could not be performed.

189 In the BASIS and NGS-ProToCol datasets approximately 65% of all intronic and exonic junctions have  
190 both sides located within an annotated gene (**Figure 5**). Thus, approximately 35% of these junctions have  
191 at least one side located within an intergenic region, regions that are often dismissed *a priori* by classical  
192 fusion gene detection tools<sup>19,20</sup>. We found transcripts with incorporated cryptic (unannotated) exons. For  
193 instance, a BrCa sample harboured intergenic junctions in *SDC4* transcripts using 5 consecutive cryptic  
194 exons (**Figure S12**). In contrast, a PCa sample had an intergenic rearrangement lacking mRNA level  
195 transcripts, thus only visible by the presence of pre-mRNA (**Figure S13**).

## 196 Genes associated with peaks in breakpoints

197 There were multiple, cancer type-specific, hotspots of junctions located near known oncogenes (**Figure 3**)  
198 such as *KIT*, *PDGFRA*, *EGFR*, *CDK4*, *MDM2* (glioma), *TMPRSS2*, *ERG* (PCa), *FGFR1* and *CCDN1* (BrCa).  
199 Recurrent gene fusions are depicted in **Table S2** and the list of all identified junctions is provided in an  
200 online data repository (**Table S3**; doi:10.5281/zenodo.4159414). Enrichment analysis was performed  
201 using HUGO symbols of genes recurrently hit per cohort, indicating the pathway “*Transcriptional*  
202 *misregulation in cancer [KEGG:05202]*” is significantly more frequently hit ( $p=1.6e^{-04}$ ) within PCa due to  
203 *TMPRSS2*, *ERG*, *ETV1*, *H3FA3*, *SLC45A3* and *ELK4*. Within BrCa, pathways *ETF* and *E2F* are significantly  
204 enriched ( $p=6.75e^{-10}$ ,  $p=2.8e^{-06}$ ) in ER+ BrCa and “*Proteoglycans in cancer*” in ER- BrCa ( $p=1.4e^{-05}$ ). Genes  
205 that are recurrently hit in glioma samples were found more often in pathways “*Rap1 signaling pathway*”  
206 ( $p=3.2e^{-04}$ ), “*Glioma*” ( $p=5.9e^{-03}$ ) and “*Ras Signaling*” ( $p=2.6e^{-03}$ ) (**Table S4**).

## 207 TMPRSS2-ERG

208 In 32 of the 51 NGS-ProToCol PCa samples Dr. Disco detected the mRNA fusion-transcripts of *TMPRSS2-*  
209 *ERG* fusions, including a genomic breakpoint in 27/32 samples (**Figure 6**). These fusions were in  
210 concordance with high *ERG* expression in those samples only. The detection rate for genomic breakpoints  
211 for this oncogenic fusion gene is thus markedly higher than for the overall number of genomic  
212 breakpoints. The genomic breakpoint did not pass filtering in sample 072, was marked exonic in sample  
213 027 and was merged with closely adjacent ( $<450$  bp; insert size) exonic junctions in three samples (053,  
214 050 and 065); indicating that breakpoint-spanning reads were present in all 32 samples. Three other  
215 samples (075, 054 and 048) had their *ERG*-flanking genomic breakpoint located in an intergenic region  
216 upstream to *ERG*'s first exon (**Figures S14 & S16**). In these samples, cryptic exons were identified in  
217 *TMPRSS2-ERG* fusion mRNA transcripts (chr21:38,692,521-38,692,797 and chr21:38,701,593-38,701,947;  
218 hg38). Two of the three samples with their breakpoint before *ERG* had additional deletions in *ERG*,  
219 removing exon 2. The most abundant intronic junctions were T1-E4 and T1-E5 (**Figures 6 & S15-S16**)

220 which is in concordance with previous reports <sup>25</sup>. Genomic breakpoints were indeed located in hotspot-  
221 regions within the first two introns of *TMPRSS2* and the last half of *ERG* intron 3 <sup>26</sup>. Additional shallow  
222 sequenced FFPE RNA-seq samples which were subsequently analysed by Dr. Disco revealed the  
223 *TMPRSS2-ERG* fusion in 181 samples (**Figures S15-S16**) and confirmed this remarkable breakpoint  
224 preference region within *ERG* intron 3 more precisely.

225 PCa cell line VCaP is known to have *TMPRSS2-ERG* with two additional rearrangements <sup>26,27</sup>. We  
226 interrogated the fusion in VCaP using Dr. Disco on both rRNA-minus and poly(A)<sup>+</sup> RNA-seq data. Poly(A)<sup>+</sup>  
227 RNA-seq shows that only the first exon of *TMPRSS2* splices to *ERG*, even though the genomic breakpoint  
228 to *ERG* is located in the 5<sup>th</sup> intron (**Figure S17A**). The rRNA-minus data confirms this splice junction but  
229 also reveals all the other genomic breakpoints spanning *TMPRSS2* and *ERG*. Read stranding indicates that  
230 a region containing the 4<sup>th</sup> and 5<sup>th</sup> exon is inverted, and that its breakpoint-A is an inversion. Breakpoint-B  
231 is an amplification and the junction from *TMPRSS2* to *ERG* is again inverted such that *ERG* is in its original  
232 orientation, which deletes the genomic region containing exons 2 and 3 of *ERG*. Thus, only *TMPRSS2* exon  
233 1 splices to *ERG* since exon 2 and 3 are deleted and exon 4 and 5 are inverted (**Figure S17B**). The small  
234 proportion of reads within the deleted *TMPRSS2* exons 2 and 3 in the rRNA-minus data originated from  
235 the non-fusion allele(s). The rRNA-minus RNA-seq data not only revealed both intronic and exonic  
236 junctions but also clarifies the complex downstream effects on transcription. As expected, analysing the  
237 rRNA-minus RNA-seq data with FusionCatcher <sup>15</sup> resulted only in the exonic *TMPRSS2-ERG* junction,  
238 similar to the Dr. Disco results in poly(A)<sup>+</sup> RNA-seq data.

239 Other PCa-related and detected *TMPRSS2* fusions were *TMPRSS2-RERE*, *SERINC5-TMPRSS2*, *TMPRSS2-*  
240 *TBX3*, *TMPRSS2-PADI4*, *MGA-TMPRSS2* and *TMPRSS2-CATSPER2* (**Table S5**). Two novel exons in *TMPRSS2*  
241 were observed in both fusion and wild-type transcripts (**Figure 6**). These cryptic exons were both lowly  
242 expressed as they represented ~3% of all *TMPRSS2-ERG* reads in samples having the splice variant.  
243 Additionally, intergenic *TMPRSS2* exon-0 <sup>28</sup> was detected by Dr. Disco in fusion mRNA-transcripts within  
244 18/32 *TMPRSS2-ERG* positive samples.

245 In one sample we identified an exonic junction originating in *ERG* and spanning to *TMPRSS2* in which the  
246 gene order and included exons indicated that this *ERG-TMPRSS2* fusion was caused by a reciprocal  
247 translocation instead of the common 3 Mb deletion (**Figure S18**).

## 248 **Large gene amplifications**

249 Hotspot regions (20-30 Mb) enriched with RNA-seq detected breakpoints were observed in the BrCa  
250 (chr11) and glioma (chr12) datasets. These hotspots differ from focal events (e.g. *TMPRSS2-ERG*) in the  
251 sense that they were larger, had no consistent fusion-partners and often contained multiple hotspot  
252 junctions per sample. To understand their function and what triggers their selective advantage, the  
253 transcriptional effects of these rearrangements were investigated by performing differential gene  
254 expression analysis between BrCa and glioma samples with and without a chr11 and chr12 hotspot



255 rearrangement (BrCa: n=122/283; glioma: n=45/274, respectively). BrCa samples having a chr11 hotspot  
256 rearrangement were characterized by a large stretch of significant up-regulated genes within the  
257 respective hotspot region (**Figures 7A-C & S19**). The large genes *SHANK2* and *TENM4*, both located in  
258 the hotspot region, were the most frequently hit genes (25 and 13 BrCa samples, respectively), yet were  
259 not among the strongest up-regulated genes of the overall region. Instead, genes with an extreme fold-  
260 change were *FGF4* and *CCND1*, the cluster *KCTD21*, *ALG8* & *GAB2* and genes downstream of *TENM4*. Up-  
261 regulation of the overall region indicates amplifications of *CCND1* and/or the gene cluster, which is in  
262 concordance with previous reports <sup>29</sup>. The high frequency of junctions in the relatively large, yet not  
263 heavily upregulated *SHANK2* (785 kb) and *TENM4* (788 kb), suggests they are ‘collateral damage’ of the  
264 amplifications; a hypothesis that has been described in glioma previously <sup>30</sup>. This hypothesis is further  
265 supported by the lack of consistent fusion partners, consistency in acting as acceptor or donor and the  
266 absence of a clear spike in cumulative breakpoints (**Figure 7A-B; Table S6**).

267 Glioma samples having a junction harbouring the chr12 hotspot region (**Figure 7D-F**) were analysed  
268 similarly and also showed up-regulation of genes in the hotspot locus, with an increased fold-change of  
269 *CDK4*, *MDM2* and neighbouring genes. Both *CDK4* and *MDM2* are known to be hyper-amplified in  
270 glioblastoma <sup>31</sup>, often by double minute chromosomes <sup>32</sup>. The Dr. Disco detected junctions showed a sharp  
271 increase in close proximity of *CDK4* (**Figure 7D-E**), likely indicating a common start of the amplification  
272 event. These breakpoints and up-regulated genes ceased just prior to *LRIG3*. Similarly, glioma samples  
273 harbouring rearrangement near the common hyper-amplified *EGFR* showed up-regulation of the  
274 surrounding locus (**Figure S20**). These results show that using RNA-seq data only, Dr. Disco can identify  
275 genomic breakpoints, which can thereafter be used to reveal associated over-expression of oncogenes  
276 which have resulted from high copy gene amplifications.

## 277 **Chromothripsis**

278 In VCaP, the q-arm of chr5 has been subjected to chromothripsis as revealed by 468 intrachromosomal  
279 WGS-detected breakpoints <sup>27</sup>. Seventeen intronic and exonic junctions were detected by Dr. Disco in  
280 rRNA-minus RNA-seq, identifying evidence for chromothripsis events in VCaP at the (pre-)mRNA level  
281 (**Figure S21**). In three BrCa samples, high numbers of WGS-detected genomic breakpoints were identified  
282 on the q-arm of chr17 which recurrently involved the genes *BCAS3*, *APPBP2*, *MED13*, *USP32* and *VMP1*  
283 (**Figure S22**). RNA-seq analysis revealed intronic and exonic junctions in concordance with the WGS data,  
284 which demonstrates the possibility to observe chromothripsis derived junctions in RNA-seq.

## 285 **CircRNA detection**

286 Head-to-tail aligned reads (**Figure S23**) are marked as chimeric (discordant) by STAR and are used as  
287 input for Dr. Disco. Such reads are not only observed in transcripts from genomic tandem duplications,  
288 but also from circular mitochondrial DNA and circular RNAs. Using the PCA-Lines rRNA-minus samples,  
289 we found that 88.6% of the junctions with a head-to-tail orientation were located exactly on exon-

290 junctions corresponded to annotated circRNAs from circBase 31 (**Figure S24**). This indicates that Dr.  
291 Disco is also capable of identifying circRNAs within rRNA-minus RNA-seq data.

## 292 Discussion

293 RNA-seq is generally performed on poly(A)<sup>+</sup> RNA-seq and fusion gene detection algorithms are mostly  
294 focused on annotated exons or splice junctions. For a broader understanding of the transcriptome, it has  
295 become common practice to sequence ribosome-depleted total RNA (rRNA-minus RNA)<sup>12</sup>, especially  
296 used for partially degraded RNA samples. rRNA-minus RNA-seq is interesting as it yields also non-  
297 polyadenylated transcripts and pre-mRNA-derived intronic sequences. As a result, there is more genomic  
298 coverage in rRNA-minus RNA-seq alignments and it is closer to whole genome sequencing compared to  
299 poly(A)<sup>+</sup> RNA-seq (**Figure S25**). Because genomic breakpoints are often harboured within introns<sup>6</sup> and  
300 intergenic regions (**Figure S26**), we interrogated to what extent rRNA-minus RNA-seq can be used to  
301 reveal genomic breakpoints as this also captures intronic (pre-mRNA) reads<sup>10</sup>. Here, we show by utilizing  
302 Dr. Disco that rRNA-minus RNA-seq data can indeed reveal exact genomic breakpoints of expressed  
303 transcripts, including intergenic translocations. Detection was limited to approximately 10% of all  
304 present breakpoints but markedly higher for the driver TMPRSS2-ERG fusion gene (85% detected; 100%  
305 presence). Discovering these genomic breakpoints at transcriptional level (RNA) on top of exonic  
306 junctions requires an analysis strategy keeping these two levels of information separated. We show that  
307 the increased search space combined with graph transformation as implemented in Dr. Disco is a solution  
308 to this challenge by providing a unique view on the transcriptome.

309 CircRNAs are a relatively new group of non-polyadenylated transcripts with more than 90,000 different  
310 human circRNAs identified so far<sup>33,34</sup>. The distinctive signature of proximate exonic head-to-tail junctions  
311 sets them apart from other junctions, except for small tandem duplications. A useful addition to the  
312 algorithm could be annotation of the junctions using a circRNA database such as circBase<sup>33</sup>. As Dr. Disco  
313 is not specifically designed to identify circRNAs and has stringent cut-off levels, the number of circRNAs  
314 identified by Dr. Disco is much lower as compared with dedicated detection software such as CIRI<sup>35,36</sup>.

315 The number of intronic RNA-seq junctions varied largely between the four different cancer types (PCa,  
316 BrCa, CRC and glioma). This variation is in line with the omics-reported number of structural variants;  
317 low in colorectal cancer<sup>37</sup> while high in breast cancer<sup>38,39</sup>, but is influenced by sequencing depth, read  
318 length and library preparation which vary per dataset.

319 The comparison with WGS data indicated that only a fraction of all genomic rearrangements is  
320 transcribed. It is expected that non-transcribed genomic breakpoints more often involve passenger  
321 events than transcribed genomic breakpoints. Conversely, oncogene driver events such as TMPRSS2-ERG  
322 are characterized by high expression and thus high breakpoint detection rates, as do their mRNA level  
323 fusion genes. Known exceptions that can be considered driver events include promoter and enhancer  
324 rearrangements such as known for *AR* and *FOXP1*<sup>40</sup>, but also tumour suppressor gene deletions<sup>41,42</sup>.

325 Although WGS depth surpasses 40x coverage, Dr. Disco showed that 26% and 48% of all RNA-seq intronic  
326 breaks in PCa and BrCa, respectively, were not identified by WGS. Multiple reasons may explain this  
327 discrepancy; high RNA-seq coverage of highly expressed genes (up-to 1000x), clonality as this difference  
328 was in particular high for a small subset of samples, local low coverage in DNA-seq, intergenic exonic  
329 junctions not spanning canonical splice junctions, and selection criteria in software such as conservative  
330 cut-offs for genomic breakpoint detection and read mapping rulings but they may also contain false  
331 positives. For Dr. Disco, both read-length and coverage are directly linked to the number of detected  
332 genomic breakpoints and fusion splice junctions. In the PCa-LINES FFPE dataset, we found that samples  
333 with low insert sizes or short read lengths resulted in insufficient split-reads whilst resulting in many  
334 false positive read-pairs in the full transcriptome analysis, but could still be used effectively in identifying  
335 the targeted, highly expressed, *TMPRSS2-ERG* fusion events.

336 From our Dr. Disco analyses, we were able to resolve the genomic breakpoints and splice variants for  
337 various known and novel fusion events. The PCa-specific *TMPRSS2-ERG* fusions and breakpoints were  
338 investigated in detail and revealed additional cryptic and intergenic exons including *TMPRSS2* exon-0<sup>28</sup>  
339 and breakpoints located before *ERG*. For some of these fusion events (e.g. VCaP cell line), the genomic  
340 rearrangement is complex and consists of insertions, deletions and inversions. The use of stranded RNA-  
341 seq provides an advantage in deciphering complex genomic rearrangements. In VCaP, an inversion results  
342 in partial anti-sense transcription from which the chronological order of events can be deduced. The  
343 manual unravelling of the complex *TMPRSS2-ERG* variant in VCaP shows the importance of automatic  
344 resolution of complex genomic rearrangements or poly-fusions. The current implementation of Dr. Disco  
345 does not offer top-level integration for poly-fusions but there are methods available with that aim<sup>7,43</sup>. In  
346 addition, the effect of enhancer/promoter rearrangements and head-to-head gene fusions on the local  
347 transcriptome landscape can be resolved by stranded RNA-seq. Besides their unique genomic breakpoints,  
348 complex genomic rearrangements harbouring inversions are also characterized by regions with opposite  
349 strand transcription. Since the current Dr. Disco algorithm uses discordant reads exclusively, extending it  
350 with the detection of regions enriched with concordant opposite stranded reads may strengthen  
351 detection of genomic rearrangements having insufficient breakpoint coverage. RNA-seq data can reveal  
352 genomic breakpoints, (cryptic and/or intergenic) splicing and gene expression information, which  
353 together can reveal consequences and their selective advantage for cancer development and progression  
354 and be a useful supplement to DNA-seq.

355 In both BrCa and glioma, RNA-seq data revealed hotspot regions of junctions with the subsequent up-  
356 regulation of known amplified oncogenes within these regions. This integrated RNA-seq analysis utilizing  
357 recurrent junctions coupled with gene expression analysis of neighbouring genes directly uncovered  
358 known oncogenes. This shows which changes at RNA level are most prominent, and thus which genes are  
359 most strongly influenced by these genomic aberrations. Then the direction of transcription provides  
360 additional context, by showing that there are no consistent acceptor/donor genes. Indeed, as DNA  
361 detection of translocations is the golden standard, a combined RNA DNA analysis would yield more

362 comprehensive results. Furthermore, the expression analysis indicated that certain detected fusion  
363 transcripts such as *TEM4* and *SHANK2* fusions are likely not driving cancer in these cases. In BrCa, the  
364 RNA detected junctions originating from driver gene amplifications were often located within the sizeable  
365 genes *SHANK2* and *TENM4*. It is likely that selection of breakpoints near *SHANK2* is influenced by being  
366 adjacent to *CTTN*, a gene containing an enhancer often co-amplified with *CCND1*<sup>41</sup>. The hotspots found in  
367 *TMPRSS2-ERG*, *CCDN1*, *CKD4/MDM2* were based on frequent events, but also rare and single  
368 combinations of transcribed rearrangements and aberrant gene expression can be extracted from Dr.  
369 Disco employed on RNA-seq data.

370 In the VCaP cell line and three BrCa samples, chromothripsis derived junctions were observed at RNA  
371 level. Similar to the observation of regular genomic rearrangements, the majority of the chromothripsis  
372 rearranges were not detected on RNA level. Solely based on RNA-seq data, it will be difficult to prove  
373 presence of chromothripsis as not all parameters that define this specific process can readily be extracted  
374 (e.g. copy-number variations, short insertions, loss of heterozygosity)<sup>44,45</sup>. However, potential indicators  
375 for chromothriptic events within cancer cells can be extracted using Dr. Disco.

376 Approximately 35% of the junctions in rRNA-minus datasets were full or partial intergenic events, of  
377 which exonic junctions often included cryptic exons. Also, for well-known in-frame gene-gene fusions  
378 such as *TMPRSS2-ERG*, many novel cryptic exons were identified that, although often rare, can result in  
379 sections of nonsense protein. Cryptic exons may encode completely novel neo-antigens that are more  
380 divergent than point mutation-based neo-antigens and could therefore likely be more immunogenic<sup>46</sup>.  
381 Deciphering the consequence of rearrangements, annotation of novel cryptic exons and their coding  
382 potential for nonsense protein sequences is therefore relevant for therapeutic interventions using  
383 tumour-specific antigens<sup>47</sup>.

384 Facilitated by Dr. Disco, we set out to extract both intronic and exonic junctions from comprehensive  
385 rRNA-minus RNA-seq datasets and identified novel DNA breakpoints, circRNAs, gene fusions, cryptic  
386 exons, chromothripsis events and were able to link expressed rearrangements to transcriptional outcome.  
387 Performing analysis as presented can be an informative supplement to WGS analysis because of stranding,  
388 expression levels and analysis of gene structures. However, in case of lacking WGS data such analysis can  
389 provide additional information as compared to poly(A)<sup>+</sup> RNA-seq, but will require deeper coverage to  
390 achieve similar exon depth. Thus, rRNA-minus RNA-seq provides unique and more complete information  
391 on non-polyadenylated and aberrant transcripts and, if the pre-mRNA is sequenced, the genomic  
392 breakpoints that underlie transcriptional changes.

393

## 394 **Methods**

### 395 **Sequencing and datasets**

396 Datasets analysed in this study are the BrCa dataset BASIS (n=207)<sup>23,24</sup>, NGS-ProToCol (normal adjacent  
397 prostate; n=41, prostate cancer; n=51; normal adjacent colon; n=18, colorectal adenoma; n=30 and  
398 colorectal carcinoma; n=30)<sup>34,48</sup> and the Chinese glioma atlas CGGA (various glioma types; n=274)<sup>49</sup> of  
399 which the data accession identifiers are given in **Table 1**.

400 For the NGS-ProToCol cohort, RNA was extracted using RNA-Bee (Campro Scientific, Berlin, Germany)  
401 and the library prepared for RNA-seq used the NEBNext Ultra Directional RNA Library Prep Kit for  
402 Illumina with rRNA reduction. The sample preparation was performed according to the protocol  
403 '*NEBNext Ultra Directional RNA Library Prep Kit for Illumina*' (NEB, Cat. #E7420S/L and E6310S/L/X).  
404 Briefly, rRNA was reduced using RNase H-based method. Then, fragmentation of the rRNA reduced RNA  
405 and a cDNA synthesis was performed. This was used for ligation with the sequencing adapters and PCR  
406 amplification of the resulting product. The quality and yield after sample preparation were measured  
407 with the Fragment Analyzer (Advanced Analytical). Clustering and DNA sequencing using the Illumina  
408 cBot and HiSeq 2500 was performed according to manufacturer's protocols. A concentration of 16.0 pM  
409 of DNA was used as input. HiSeq control software HCS (v2.2.58) was used. Image analysis, base calling,  
410 and quality check was performed with the Illumina data analysis pipeline RTA (v1.18.64) and Bcl2fastq  
411 (v2.17). The 126 bp stranded Illumina HiSeq 2500 paired-end reads have a peak in fragment size of 300-  
412 600 bp and the samples have an average depth of 70 million paired-end reads.

413 The PCa-LINES dataset consists of PCa cell lines PC346C and VCaP and additional PCa patient samples G-  
414 089, G-110, G-295, G-316 and G-346. Each of these samples were WGS DNA sequenced and processed  
415 using the complete genomics platform<sup>27,50</sup>. The matching poly(A)<sup>+</sup> RNA-seq samples were taken from the  
416 TraIT-Cell Line Use Case<sup>51,52</sup>. The matching rRNA-minus samples of G-089, G-295, G-316, G-346, VCaP  
417 and PC346C were processed similarly as the rRNA-minus samples from the NGS-ProToCol dataset. rRNA-  
418 minus RNA-seq sample G-110 was sequenced in the NGS-ProToCol study as sample 7046-004-052.

419 In the BASIS RNA-seq dataset, total RNA was extracted and cleaned from abundant RNAs such as rRNA  
420 and tRNA using duplex-specific nuclease treatment prior to random primed cDNA synthesis<sup>53</sup>. The BASIS  
421 DNA-seq data preparation and analysis is described elsewhere<sup>23</sup> and coordinates were converted to hg38  
422 using *pyliftover* where needed.

423 The detection of genomic breakpoints from additional TMPRSS2-ERG fusions determined by targeted  
424 DNA-seq was described elsewhere<sup>26</sup> and genomic coordinates were obtained from this study accordingly.  
425 DNA breakpoints of TMPRSS2-ERG and chromothripsis on chr5 in VCaP were described elsewhere<sup>26,27</sup>.  
426 The predicted CMS classes for the NGS-ProToCol colon samples were described elsewhere<sup>48</sup>.

## 427 **Computational data analysis**

428 RNA-seq data was aligned with STAR <sup>54</sup> version 2.4.2 with fusion settings using hg38 as reference genome.  
429 A more detailed description of the used methodology is given in **Supplementary methods**. Dr. Disco  
430 version 0.17.8 (git commit 2a9ff32950b71029b124ff4d16544b2953c57dbe) was used for all analysis. Dr. Disco is  
431 available under a Free Open-Source Software license at the website: [https://github.com/yhoogstrate/dr-](https://github.com/yhoogstrate/dr-disco)  
432 [disco](https://github.com/yhoogstrate/dr-disco). For this study, we designed a free software package to generate Lorenz and coverage plots:  
433 <https://github.com/yhoogstrate/bam-lorenz-coverage>. Processed bam files used to estimate general  
434 genome coverage statistics were obtained from EGAS00000000052 <sup>55</sup>. Pathway enrichment was  
435 performed with g:Profiler (<https://biit.cs.ut.ee/gprofiler/gost>) <sup>56</sup> using gene identifiers as a non-ordered  
436 query. For differential expression analysis, the annotation of the results of Dr. Disco and further  
437 integration with gene sets for determining intergenic and protein coding status, Ensembl gene annotation  
438 89 was used.

439 Plots were made with R 3.6.2 (base R, ggplot2, plotrix and circize) and illustrations with Inkscape.  
440 Differential gene expression analysis was performed using the edgeR 3.2.8 library <sup>57</sup>. Associations  
441 between the frequency of breakpoints per sample and clinical parameters were tested using the Mann  
442 Whitney U test in R. For the Venn diagrams describing overlap across intronic, exonic and WGS junctions,  
443 both sides of the junctions must be within 40 genomic nucleotides in proximity to be considered a match.

444 Chromosomal differential expression plots were made using base R. For a given locus and q-value  
445 threshold, a cohort is separated in a mutant and wildtype group by having one or more intronic or exonic  
446 junctions within the given locus. Differential expression analysis is performed across these groups using  
447 edgeR. Every gene located on the chromosome on which the locus is located, is plotted with its genomic  
448 centre as defined by Ensembl 89 on the x-axis and with edgeR's log fold change on the y-axis. A gene that  
449 is up-regulated in the mutant group has a positive log fold change and a gene that is down regulated a  
450 negative log fold change. When the gene is not significantly differentially expressed across the wildtype  
451 and mutant group (q-value below predetermined threshold) the gene will be coloured grey. If the  
452 difference is significant, it will be coloured green (up) or red (down).

## 453 **Data Access**

454 Dr. Disco is available at the following url: <https://github.com/yhoogstrate/dr-disco>.

455 Raw sequencing is accessible at the following public repositories: EGAS00001002816,  
456 EGAS00001002854, EGAS00001001178, EGAD00001006366, GSE48865, EGAS00001001178,  
457 EGAS00001001476 (**Table 1**).

458 The concatenated results on all samples (**Table S3**) using the Dr. Disco v.0.17.8 pipeline is available at:  
459 <https://doi.org/10.5281/zenodo.4159414>.

## 460 **Disclosure Declaration**

461 For the CTMM NGS-ProToCol study (NGS-ProToCol, Next Generation Sequencing from Prostate to  
462 Colorectal Cancer - Center for Translational Molecular Medicine (2014-2015);  
463 <https://www.lygature.org/ctmm-portfolio>), 51 prostate cancers from the Erasmus MC were snap-frozen  
464 and stored in liquid nitrogen as previously described<sup>58</sup>. Use of the samples for research purposes was  
465 approved by the Erasmus MC Medical Ethics Committee according to the Medical Research Involving  
466 Human Subjects Act (MEC-2004-261; MEC-2010-176).

467 Other data was obtained from publicly available studies.

468 The authors declare no competing interests.

## 469 **Funding**

470 This study was performed within the framework of the CTMM (Center for Translational Molecular  
471 Medicine) research program; NGS-ProToCol [grant 030-402]; PCMM [grant 030-203-1]; Translational  
472 Research IT (TraIT); the Complete Genomics Inc. grant [EMC GL 083111]; the FP7 Marie Curie Initial  
473 Training Network PRO-NEST [grant number 238278] and Support for the Cancer Computational Biology  
474 Center was provided by the Daniel den Hoed Foundation. Funding for open access charge: NGS-ProToCol  
475 [grant 030-402].

476

## 477 **References**

- 478 1. Weinhold, N., Jacobsen, A., Schultz, N., Sander, C. & Lee, W. Genome-wide analysis of noncoding  
479 regulatory mutations in cancer. *Nat. Genet.* **46**, 1160–1165 (2014).
- 480 2. Calabrese, C. *et al.* Genomic basis for RNA alterations in cancer. *Nature* **578**, 129–136 (2020).
- 481 3. Li, Y. *et al.* Patterns of somatic structural variation in human cancer genomes. *Nature* **578**, 112–  
482 121 (2020).
- 483 4. Tomlins, S. A. *et al.* Recurrent fusion of TMPRSS2 and ETS transcription factor genes in prostate  
484 cancer. *Science* **310**, 644–8 (2005).
- 485 5. Burmeister, T. *et al.* Patients' age and BCR-ABL frequency in adult B-precursor ALL: A  
486 retrospective analysis from the GMALL study group. *Blood* **112**, 918–919 (2008).
- 487 6. Annala, M. J., Parker, B. C., Zhang, W. & Nykter, M. Fusion genes and their discovery using high  
488 throughput sequencing. *Cancer Lett.* **340**, 192–200 (2013).
- 489 7. McPherson, A. *et al.* NFuse: Discovery of complex genomic rearrangements in cancer using high-  
490 throughput sequencing. *Genome Res.* **22**, 2250–2261 (2012).
- 491 8. Zhang, J. *et al.* INTEGRATE: Gene fusion discovery using whole genome and transcriptome data.  
492 *Genome Res.* **26**, 108–118 (2016).
- 493 9. Zhao, S., Zhang, Y., Gamini, R., Zhang, B. & Von Schack, D. Evaluation of two main RNA-seq  
494 approaches for gene quantification in clinical RNA sequencing: PolyA+ selection versus rRNA  
495 depletion. *Sci. Rep.* **8**, 4781 (2018).
- 496 10. Erdem-Eraslan, L. *et al.* Identification of patients with recurrent glioblastoma who may benefit  
497 from combined bevacizumab and CCNU Therapy: A Report from the BELOB Trial. *Cancer Res.* **76**,  
498 525–534 (2016).
- 499 11. Taggart, A. J. & Fairbrother, W. G. ShapeShifter: a novel approach for identifying and quantifying  
500 stable lariat intronic species in RNAseq data. *Quant. Biol.* (2018) doi:10.1007/s40484-018-0141-x.
- 501 12. Zhao, W. *et al.* Comparison of RNA-Seq by poly (A) capture, ribosomal RNA depletion, and DNA  
502 microarray for expression profiling. *BMC Genomics* **15**, 419 (2014).
- 503 13. Heyer, E. E. *et al.* Diagnosis of fusion genes using targeted RNA sequencing. *Nat. Commun.* **10**,  
504 (2019).
- 505 14. Edgren, H. *et al.* Identification of fusion genes in breast cancer by paired-end RNA-sequencing.  
506 *Genome Biol.* **12**, R6 (2011).
- 507 15. Liu, S. *et al.* Comprehensive evaluation of fusion transcript detection algorithms and a meta-caller  
508 to combine top performing methods in paired-end RNA-seq data. *Nucleic Acids Res.* **44**, e47 (2015).
- 509 16. Kim, D. & Salzberg, S. L. TopHat-Fusion: an algorithm for discovery of novel fusion transcripts.  
510 *Genome Biol.* **12**, R72 (2011).
- 511 17. McPherson, A. *et al.* Comrad: Detection of expressed rearrangements by integrated analysis of  
512 RNA-Seq and low coverage genome sequence data. *Bioinformatics* **27**, 1481–1488 (2011).
- 513 18. Ge, H. *et al.* FusionMap: Detecting fusion genes from next-generation sequencing data at base-pair  
514 resolution. *Bioinformatics* **27**, 1922–1928 (2011).
- 515 19. Nicorici, D. *et al.* FusionCatcher - a tool for finding somatic fusion genes in paired-end RNA-  
516 sequencing data. *bioRxiv* <http://biorxiv.org/lookup/doi/10.1101/011650> (2014)  
517 doi:10.1101/011650.



- 518 20. Davidson, N. M., Majewski, I. J. & Oshlack, A. JAFFA: High sensitivity transcriptome-focused fusion  
519 gene detection. *Genome Med.* **7**, 43 (2015).
- 520 21. McPherson, A. *et al.* Defuse: An algorithm for gene fusion discovery in tumor rna-seq data. *PLoS*  
521 *Comput. Biol.* **7**, (2011).
- 522 22. Bolisetty, M. T. & Beemon, K. L. Splicing of internal large exons is defined by novel cis-acting  
523 sequence elements. *Nucleic Acids Res.* **40**, 9244–9254 (2012).
- 524 23. Nik-Zainal, S. *et al.* Landscape of somatic mutations in 560 breast cancer whole-genome sequences.  
525 *Nature* **534**, 47–54 (2016).
- 526 24. Smid, M. *et al.* Breast cancer genome and transcriptome integration implicates specific mutational  
527 signatures with immune cell infiltration. *Nat. Commun.* **7**, 1–9 (2016).
- 528 25. Clark, J. *et al.* Diversity of TMPRSS2-ERG fusion transcripts in the human prostate. *Oncogene* **26**,  
529 2667–2673 (2007).
- 530 26. Weier, C. *et al.* Nucleotide resolution analysis of TMPRSS2 and ERG rearrangements in prostate  
531 cancer. *J. Pathol.* **230**, 174–183 (2013).
- 532 27. Teles Alves, I. *et al.* Gene fusions by chromothripsis of chromosome 5q in the VCaP prostate cancer  
533 cell line. *Hum. Genet.* **132**, 709–713 (2013).
- 534 28. Hermans, K. G. *et al.* Overexpression of prostate-specific TMPRSS2(exon 0)-ERG fusion transcripts  
535 corresponds with favorable prognosis of prostate cancer. *Clin. Cancer Res.* **15**, 6398–6403 (2009).
- 536 29. Elsheikh, S. *et al.* CCND1 amplification and cyclin D1 expression in breast cancer and their relation  
537 with proteomic subgroups and patient outcome. *Breast Cancer Res. Treat.* **109**, 325–335 (2008).
- 538 30. Nikolaev, S. *et al.* Extrachromosomal driver mutations in glioblastoma and low-grade glioma. *Nat.*  
539 *Commun.* **5**, 5690 (2014).
- 540 31. Rollbrocker, B., Waha, A., Louis, D. N., Wiestler, O. D. & Von Deimling, A. Amplification of the cyclin-  
541 dependent kinase 4 (CDK4) gene is associated with high cdk4 protein levels in glioblastoma  
542 multiforme. *Acta Neuropathol.* **92**, 70–74 (1996).
- 543 32. Decarvalho, A. C. *et al.* Discordant inheritance of chromosomal and extrachromosomal DNA  
544 elements contributes to dynamic disease evolution in glioblastoma. *Nat. Genet.* **50**, 708–717  
545 (2018).
- 546 33. Glažar, P., Papavasileiou, P. & Rajewsky, N. CircBase: A database for circular RNAs. *Rna* **20**, 1666–  
547 1670 (2014).
- 548 34. Chen, S. *et al.* Widespread and Functional RNA Circularization in Localized Prostate Cancer. *Cell*  
549 **176**, 831-843.e22 (2019).
- 550 35. Zeng, X., Lin, W., Guo, M. & Zou, Q. A comprehensive overview and evaluation of circular RNA  
551 detection tools. *PLoS Comput. Biol.* **13**, (2017).
- 552 36. Gao, Y., Zhang, J. & Zhao, F. Circular RNA identification based on multiple seed matching. *Brief.*  
553 *Bioinform.* **19**, 803–810 (2018).
- 554 37. Priestley, P. *et al.* Pan-cancer whole-genome analyses of metastatic solid tumours. *Nature* **575**,  
555 210–216 (2019).
- 556 38. Alaei-Mahabadi, B., Bhadury, J., Karlsson, J. W., Nilsson, J. A. & Larsson, E. Global analysis of  
557 somatic structural genomic alterations and their impact on gene expression in diverse human  
558 cancers. *Proc. Natl. Acad. Sci. U. S. A.* **113**, 13768–13773 (2016).
- 559 39. Yoshihara, K. *et al.* The landscape and therapeutic relevance of cancer-associated transcript  
17

- 560 fusions. *Oncogene* **34**, 4845–4854 (2015).
- 561 40. van Dessel, L. F. *et al.* The genomic landscape of metastatic castration-resistant prostate cancers  
562 reveals multiple distinct genotypes with potential clinical impact. *Nat. Commun.* **10**, 5251 (2019).
- 563 41. Morton, A. R. *et al.* Functional Enhancers Shape Extrachromosomal Oncogene Amplifications. *Cell*  
564 **179**, 1330–1341.e13 (2019).
- 565 42. Hamid Benjamin Petreaca, A. & Petreaca, R. Frequent homozygous deletions of the CDKN2A locus  
566 in somatic cancer tissues. *Mutat. Res. - Fundam. Mol. Mech. Mutagen.* **815**, 30–40 (2019).
- 567 43. Tian, L. *et al.* CICERO: A versatile method for detecting complex and diverse driver fusions using  
568 cancer RNA sequencing data. *Genome Biol.* **21**, 126 (2020).
- 569 44. Korbel, J. O. & Campbell, P. J. Criteria for inference of chromothripsis in cancer genomes. *Cell* **152**,  
570 1226–1236 (2013).
- 571 45. Govind, S. K. *et al.* ShatterProof: Operational detection and quantification of chromothripsis. *BMC*  
572 *Bioinformatics* **15**, 78 (2014).
- 573 46. Menez-Jamet, J., Gallou, C., Rougeot, A. & Kosmatopoulos, K. Optimized tumor cryptic peptides: The  
574 basis for universal neoantigen-like tumor vaccines. *Ann. Transl. Med.* **4**, 266 (2016).
- 575 47. Gubin, M. M., Artyomov, M. N., Mardis, E. R. & Schreiber, R. D. Tumor neoantigens: Building a  
576 framework for personalized cancer immunotherapy. *J. Clin. Invest.* **125**, 3413–3421 (2015).
- 577 48. Komor, M. A. *et al.* Molecular characterization of colorectal adenomas reveals POFUT1 as a  
578 candidate driver of tumor progression. *Int. J. Cancer* **146**, 1979–1992 (2020).
- 579 49. Bao, Z. S. *et al.* RNA-seq of 272 gliomas revealed a novel, recurrent PTPRZ1-MET fusion transcript  
580 in secondary glioblastomas. *Genome Res.* **24**, 1765–1773 (2014).
- 581 50. Hiltmann, S., Jenster, G., Trapman, J., Van Der Spek, P. & Stubbs, A. Discriminating somatic and  
582 germline mutations in tumor DNA samples without matching normals. *Genome Res.* **25**, 1382–  
583 1390 (2015).
- 584 51. Zhang, C. *et al.* Systematically linking tranSMART, Galaxy and EGA for reusing human translational  
585 research data. *F1000Research* **6**, (2017).
- 586 52. Spalding, D. *et al.* Integration of EGA secure data access into Galaxy. *F1000Research* **5**, 3–9 (2016).
- 587 53. Smid, M. *et al.* The circular RNome of primary breast cancer. *Genome Res.* **29**, 356–366 (2019).
- 588 54. Dobin, A. *et al.* STAR: Ultrafast universal RNA-seq aligner. *Bioinformatics* **29**, 15–21 (2013).
- 589 55. Pleasance, E. D. *et al.* A comprehensive catalogue of somatic mutations from a human cancer  
590 genome. *Nature* **463**, 191–196 (2010).
- 591 56. Reimand, J. *et al.* g:Profiler—a web server for functional interpretation of gene lists (2016 update).  
592 *Nucleic Acids Res.* **44**, W83–W89 (2016).
- 593 57. Robinson, M. D., McCarthy, D. J. & Smyth, G. K. edgeR: A Bioconductor package for differential  
594 expression analysis of digital gene expression data. *Bioinformatics* **26**, 139–140 (2009).
- 595 58. Hendriksen, P. J. M. *et al.* Evolution of the androgen receptor pathway during progression of  
596 prostate cancer. *Cancer Res.* **66**, 5012–5020 (2006).

597

598

## 599 **Legends supplementary files**

600 **Additional file 1** – Supplementary Figures S1-S26

601 **Additional file 2** – Table S1

602 Dr. Disco detected intronic junctions expected to be genomic breakpoints but not matching with WGS  
603 detected breakpoints in the 7 PCa samples with matching poly(A)<sup>+</sup> and rRNA-minus RNA-seq data (PCa-  
604 LINES dataset). Results are ordered by presence in either rRNA-minus, poly(A)<sup>+</sup> or both datasets.

605 **Additional file 3** – Table S2

606 Recurrent fusion genes as found by Dr. Disco in the NGS-ProToCol prostate cancer and colon datasets and  
607 the BASIS breast cancer dataset. Glioma samples were excluded because they were sequenced unstranded.  
608 Fusion genes present in at least 2 samples of the same tumour type are considered recurrent; only entries  
609 that passed filtering and were marked as ‘linear’ to avoid circRNA entries were included; both intronic  
610 and exonic entries were included but were de-duplicated per sample; only 1 unique occurrence of a  
611 fusion gene per sample; no self-fusions (TMPRSS2-TMPRSS2); no intergenic fusions; no fusions involving  
612 chrM or alternate loci. If there are multiple genes spanning the breakpoint, the Cartesian product of the  
613 gene names is used; when A,B -> C is found, this is expanded to: 1x A->C and 1x B->C.

614 **Additional file 4** – Table S3

615 Large concatenated results table on all samples of the Dr. Disco study. Available online because of the  
616 large file size: <https://doi.org/10.5281/zenodo.4159414>.

617 **Additional file 5** – Table S4

618 G:Profiler pathway enrichment analysis on genes that are recurrently hit. **(A)** ER-negative BrCa samples  
619 from the BASIS cohort; **(B)** ER-positive BrCa samples from the BASIS cohort; **(C)** glioma samples from the  
620 CGGA and **(D)** PCa samples from the NGS-ProToCol cohort. Colon samples were not included because of  
621 the relatively small number of recurrently hit genes. For the BrCa dataset only genes that were hit in 3 or  
622 more distinct samples were used in the analysis. For the glioma and PCa samples, only genes that were hit  
623 in 2 distinct samples were used in the analysis. Entries suspected to be circRNAs were excluded.

624 **Additional file 6** – Table S5

625 The concatenated Dr. Disco detected junctions related to *TMPRSS2-ERG* in the NGS-ProToCol PCa samples.

626 **Additional file 7** – Table S6

627 Dr. Disco output of detected junctions related to *SHANK2* and/or *TENM4* as found in the BASIS BrCa  
628 dataset.

629 **Additional file 8** – Supplementary methods

630 **Additional file 9** – Dr. Disco technical specification

**A**

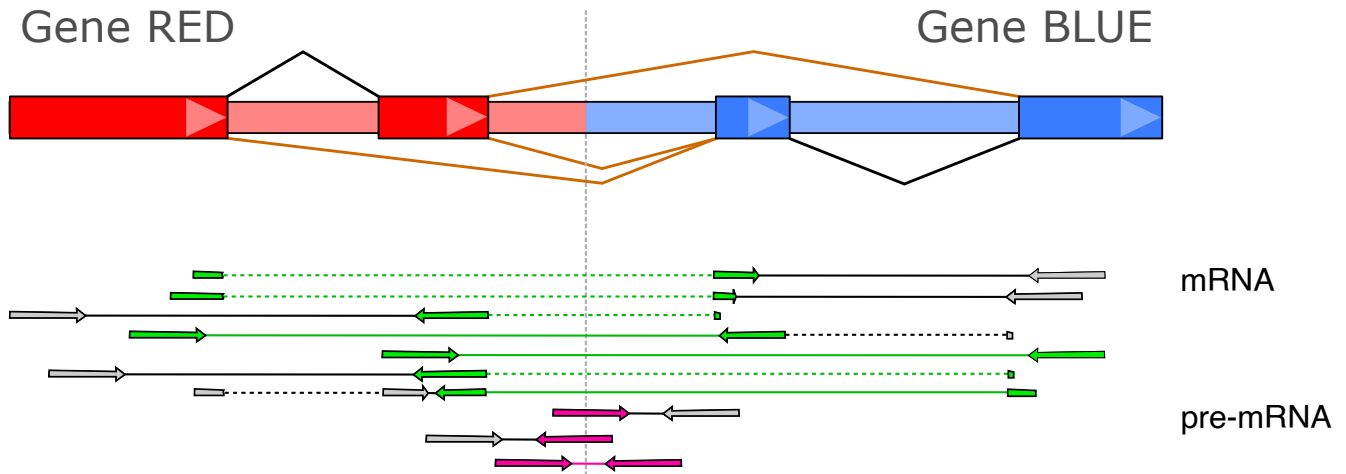

**B**

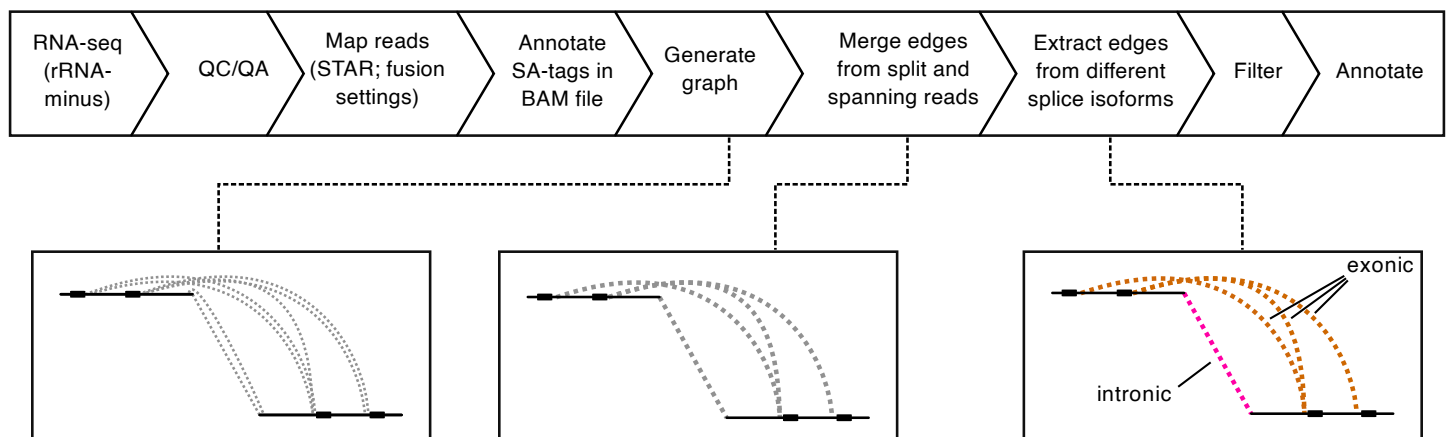

**Figure 1. Overview intronic RNA and Dr. Disco algorithm.** (A) Schematic representation of fusion-gene RED-BLUE. Due to relatively large intron sizes, in-gene genomic breakpoints are expected to occur most often intronic. The fusion could result in different isoforms of mature mRNA as indicated with fusion splice junctions (brown). Fusion splice junction spanning reads form the classical source of evidence for detecting mature mRNA fusion-events. In rRNA-minus data, intronic pre-mRNA reads (pink) may cover the causal genomic breakpoints. (B) Flowchart of the Dr. Disco pipeline. RNA-seq data is aligned to obtain discordant aligned reads; reads are transformed into edges that are inserted into a graph. In the graph, edges corresponding to either intronic or exonic junctions are kept separate. Detection of junctions is performed by analysing the graph for clusters. An additional splice variant correction is applied. Each identified junction variant is marked intronic or exonic and then filtered and annotated.

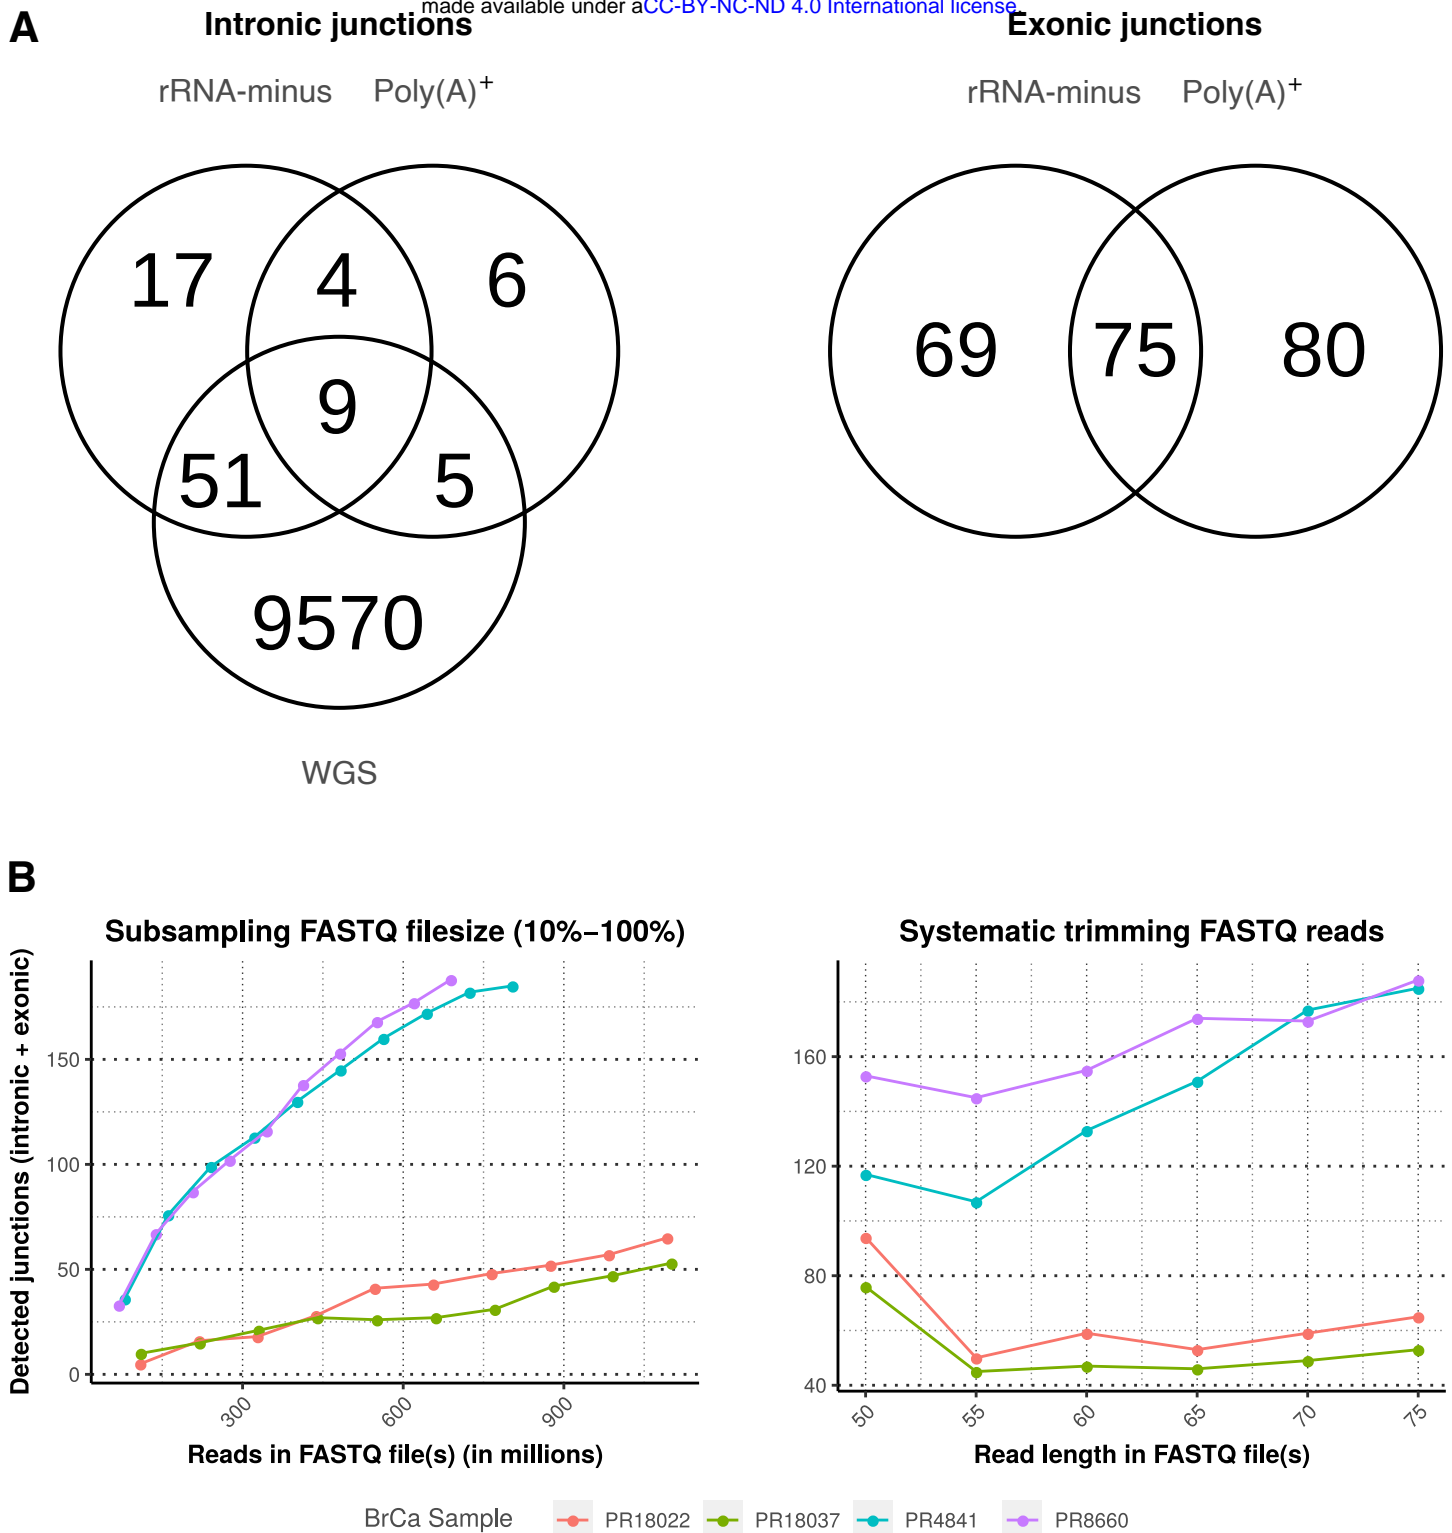

**Figure 2. Overlap across sequencing types and library size influence.** (A) Venn diagram with overlap of cumulative interchromosomal junctions of 7 WGS PCa samples rRNA-minus and poly(A)<sup>+</sup> RNA-seq (PCa-LINES dataset). Overlap in only intronic junctions representing genomic breakpoints (left) and only exonic splice junctions (right). Of the 69 exonic junctions only found in rRNA-minus RNA-seq, 40 were detected in the matching poly(A)<sup>+</sup> but did not pass filtering. Of the 80 poly(A)<sup>+</sup>-only exonic junctions, 58 were found in rRNA-minus but did not pass filtering. (B) The number of predicted junctions as function of sequencing depth (left) and read-length (right) reduction. BrCa samples were selected for high sequencing depth (PR18022 & PR18037) or a high number of junctions (PR4841 & PR8660). Left: The number of predicted junctions per sequencing-depth (10-100%) with the full read-length (2x75 bp). Reducing the sequencing depth, also for samples with a high sequencing depth, reduces the number of detected junctions. Only sample PR4841 reaches a plateau. Right: Each data point represents the number of predicted junctions per given read-length, with full sequencing-depth. Truncating sequencing-reads results in a lower number of predicted junctions. However, below 55 nucleotides this number of increases.

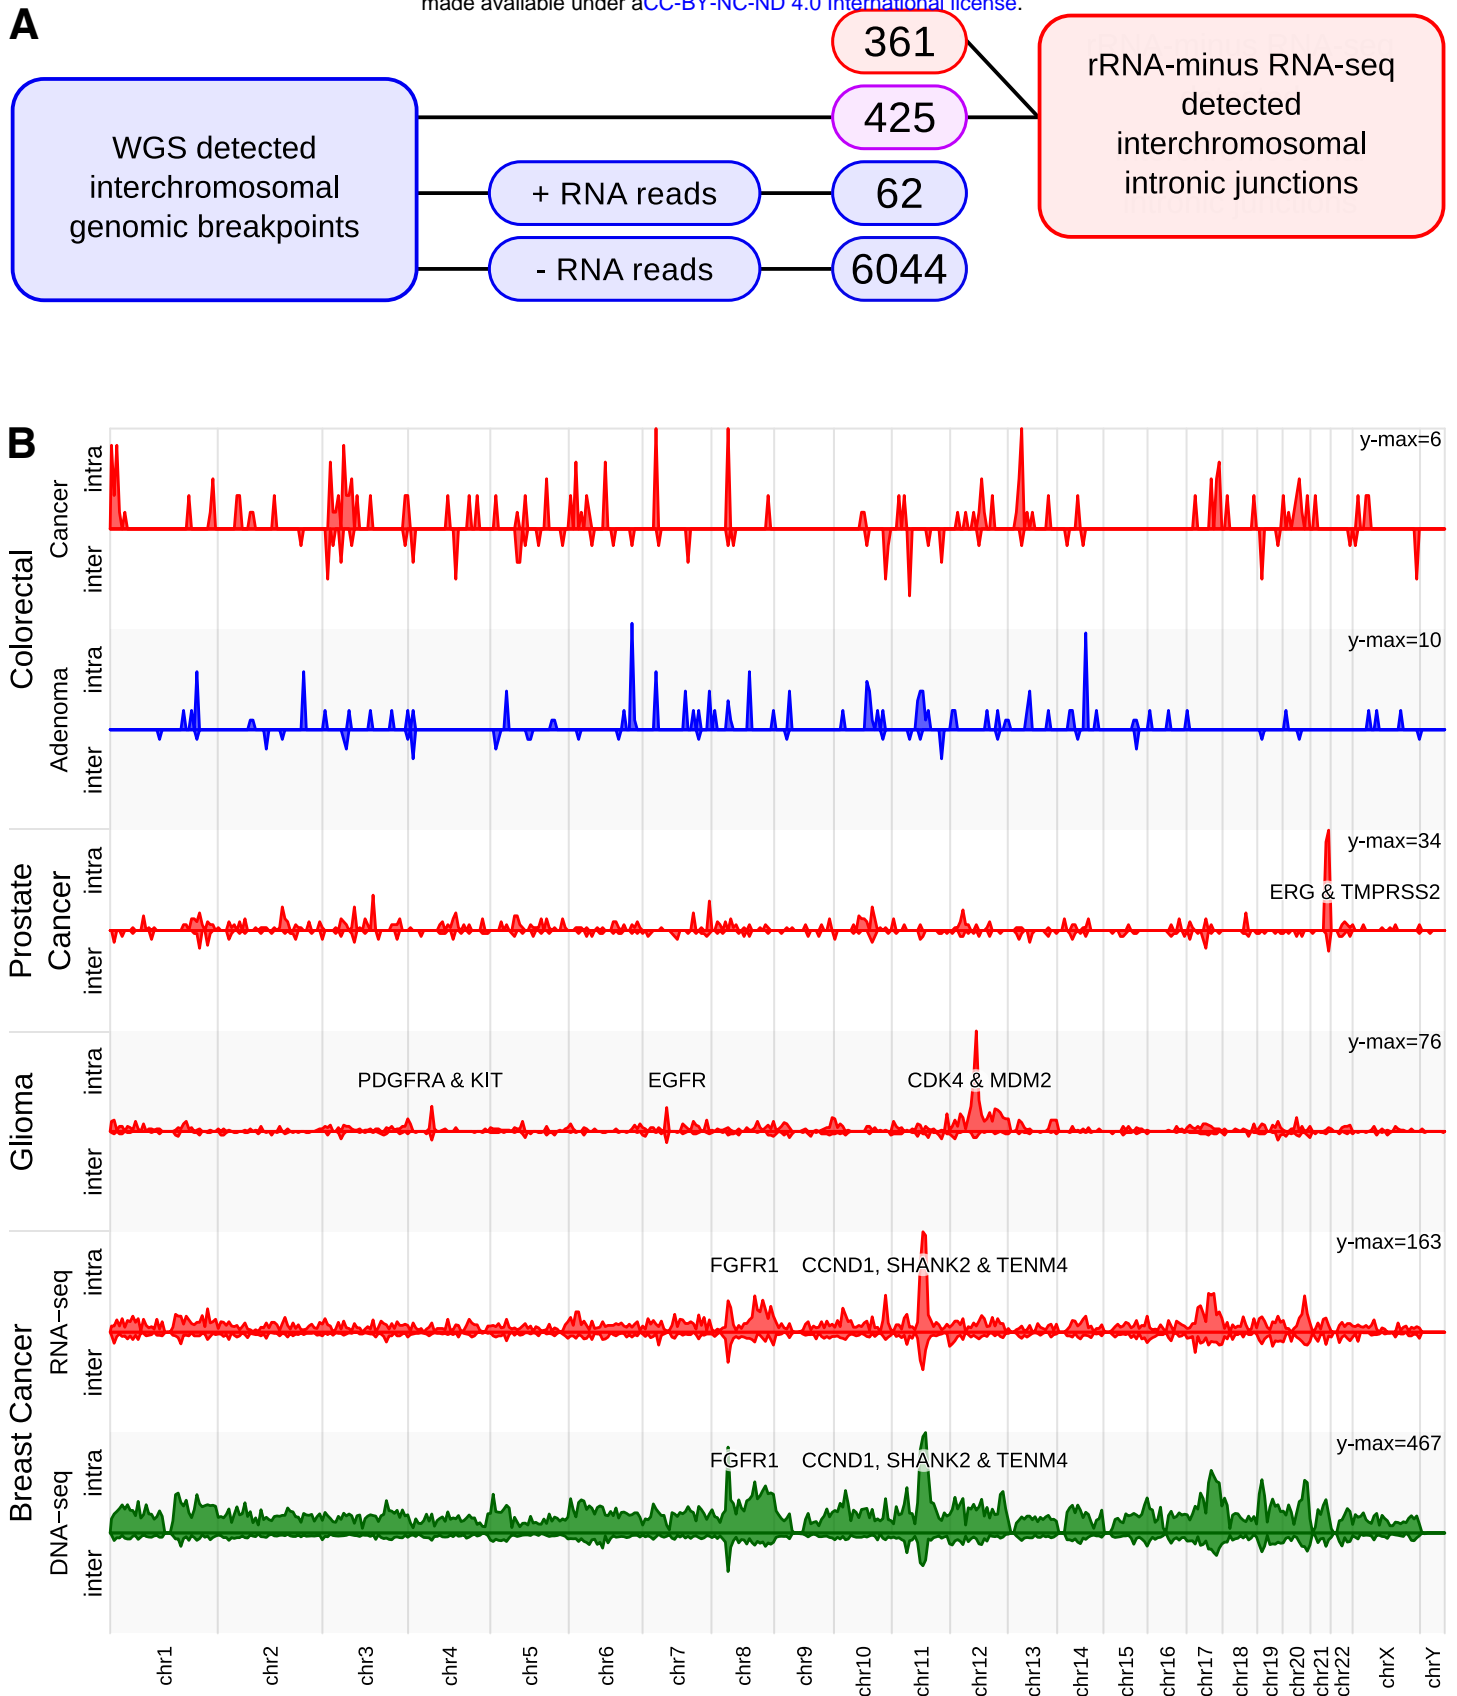

**Figure 3. Integration RNA-seq analysis with WGS results.** (A) Number of detected genomic breakpoints per subgroup in WGS and rRNA-minus RNA-seq data of 207 matching BrCa samples. Rectangles in blue indicate presence only in WGS data, in red only in RNA-seq data and in pink in both. To avoid artifacts from RNA post-processing such as circRNAs and read-throughs, only interchromosomal entries were interrogated. Of the interchromosomal WGS breakpoints, 6059 did not have sufficient discordant reads in the RNA-seq data. Of 62 genomic breakpoints, the threshold of sufficient discordant RNA-seq reads was exceeded, but it was not detected by Dr. Disco or did not pass filtering. 425 breakpoints were detected in both the assays and 361 RNA-seq detected breakpoints did not match a WGS entry. (B) Chromosome plot representing the density of inter and intrachromosomal genomic breakpoints. For the BrCa samples, Dr. Disco RNA-seq analysis (red) and WGS breakpoints (green) are depicted. The number of RNA-seq genomic breakpoints in the colorectal cancer and adenomas is low and no recurrent breakpoints were identified yet. The number of genomic breakpoints in colorectal adenomas was lower than in colorectal cancer. The observed peaks in colorectal cancer originated from multiple, sample specific, junctions (Figure S9).

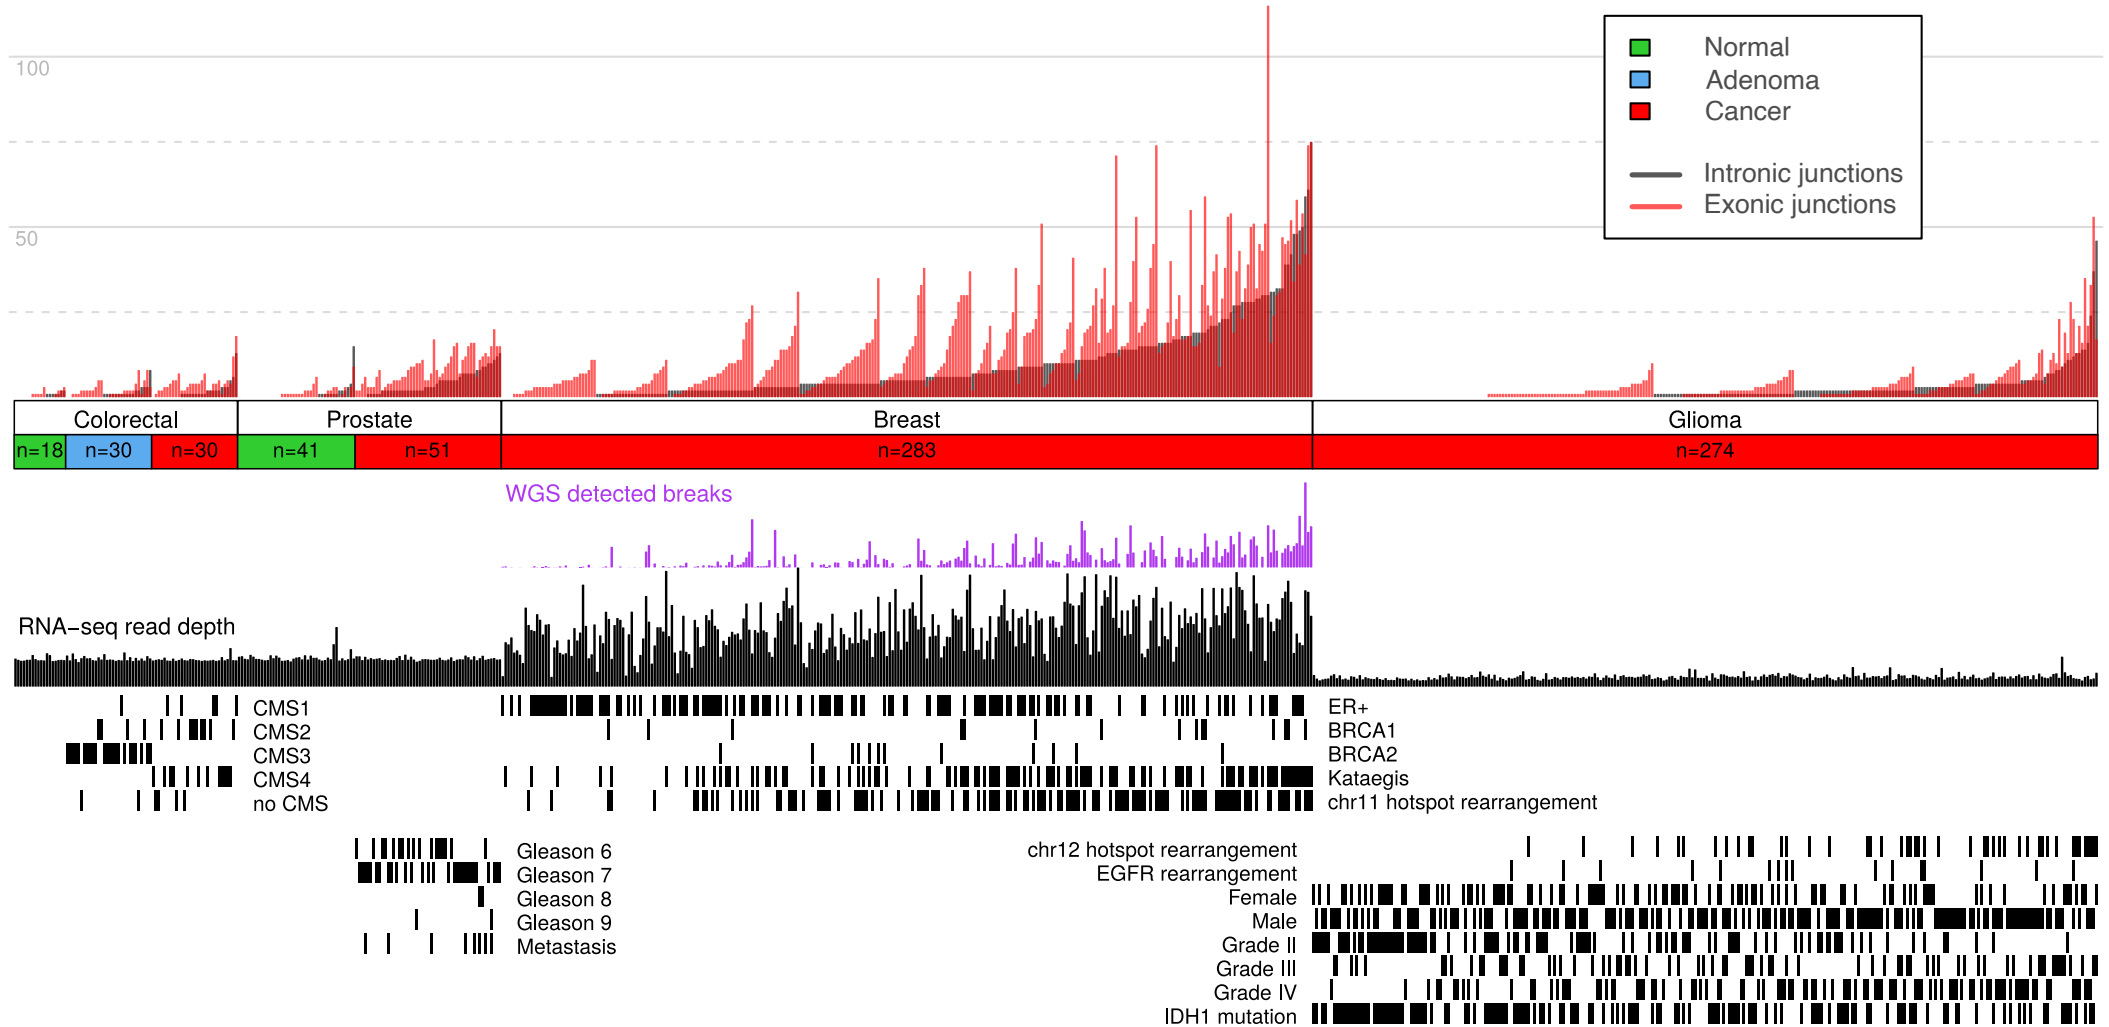

**Figure 4. Results summary.** Intronic and exonic junctions are given per sample for the NGS-ProToCol, BASIS and CGGA datasets with their associated clinical parameters. For the colon samples, the predicted CMS classes are provided, for the prostate cancer samples the Gleason grade and metastatic progression are provided, for the breast cancer samples the ER, BRCA1, BRCA2, kataegis and Dr. Disco detected chr11-hotspot status are provided and for the glioma samples the grading, recurrence, IDH1 mutation status, gender and the Dr. Disco detected EGFR and chr12 hotspot status are provided.

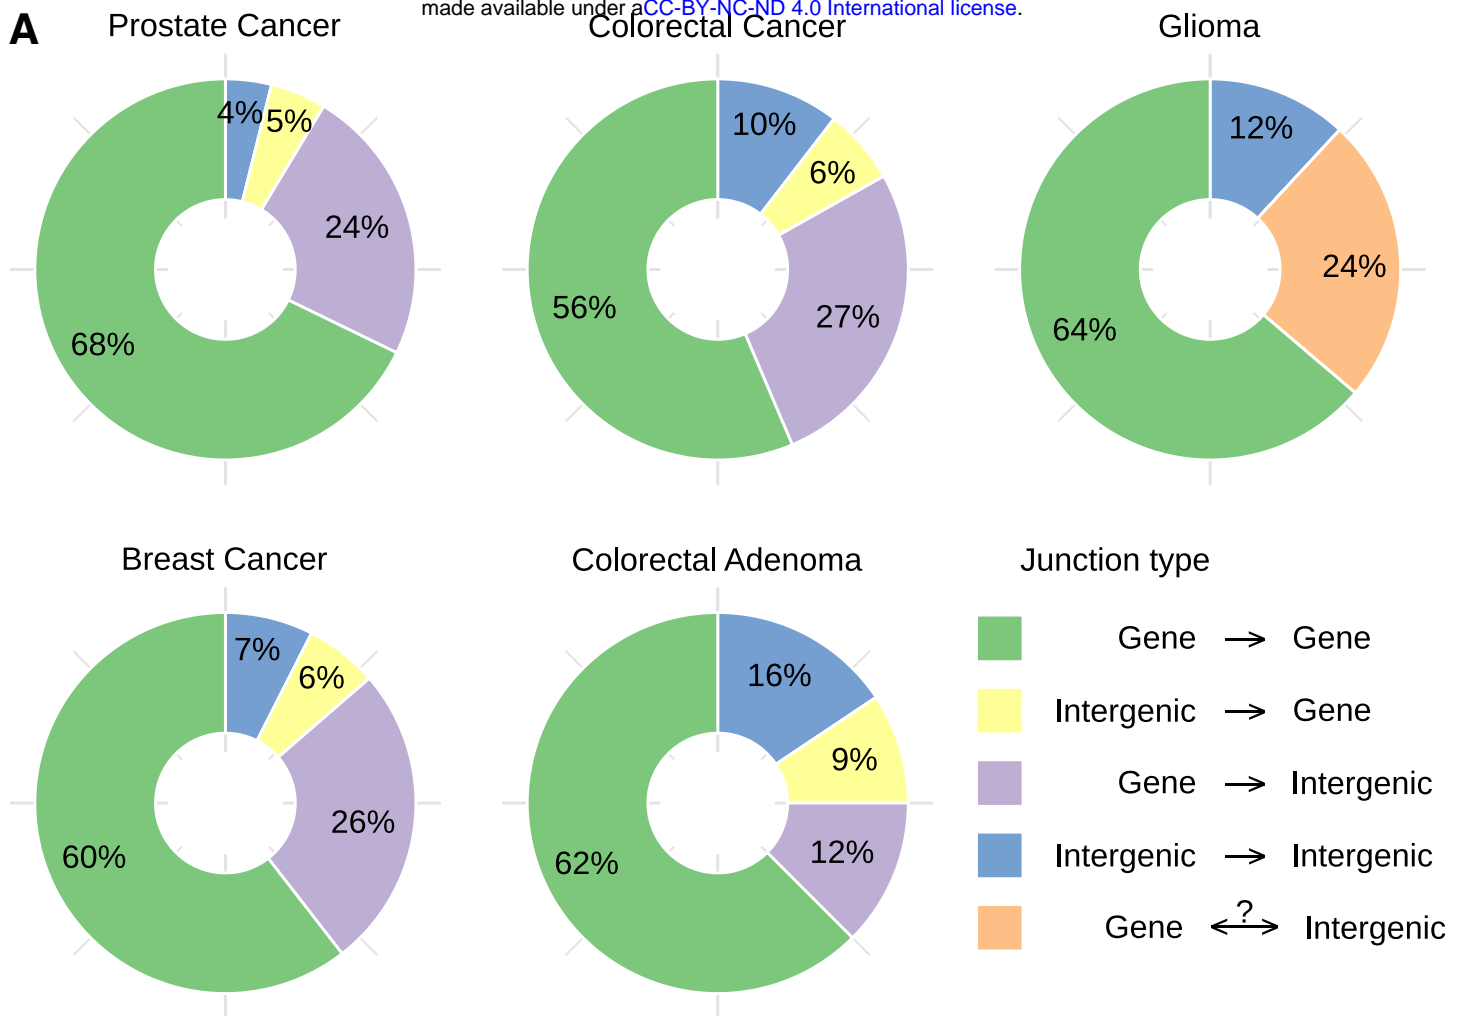

**Figure 5. Genic/Intergenic junction status.** (A) The frequency of intronic and exonic junctions with one or both breakpoints in gene and/or intergenic regions (Ensembl 89). Because the glioma dataset was sequenced unstranded, junctions with one intergenic side are grouped together. In all datasets, approximately 3/8 of the junctions have at least one intergenic side. Both inter- and intrachromosomal junctions were included, suspected circRNAs were discarded; unlocalized and unplaced sequences (chrUn\_...) and alternate loci (chr...\_alt) were discarded. Matching intronic and exonic predictions of the same variant were treated as a single entry.



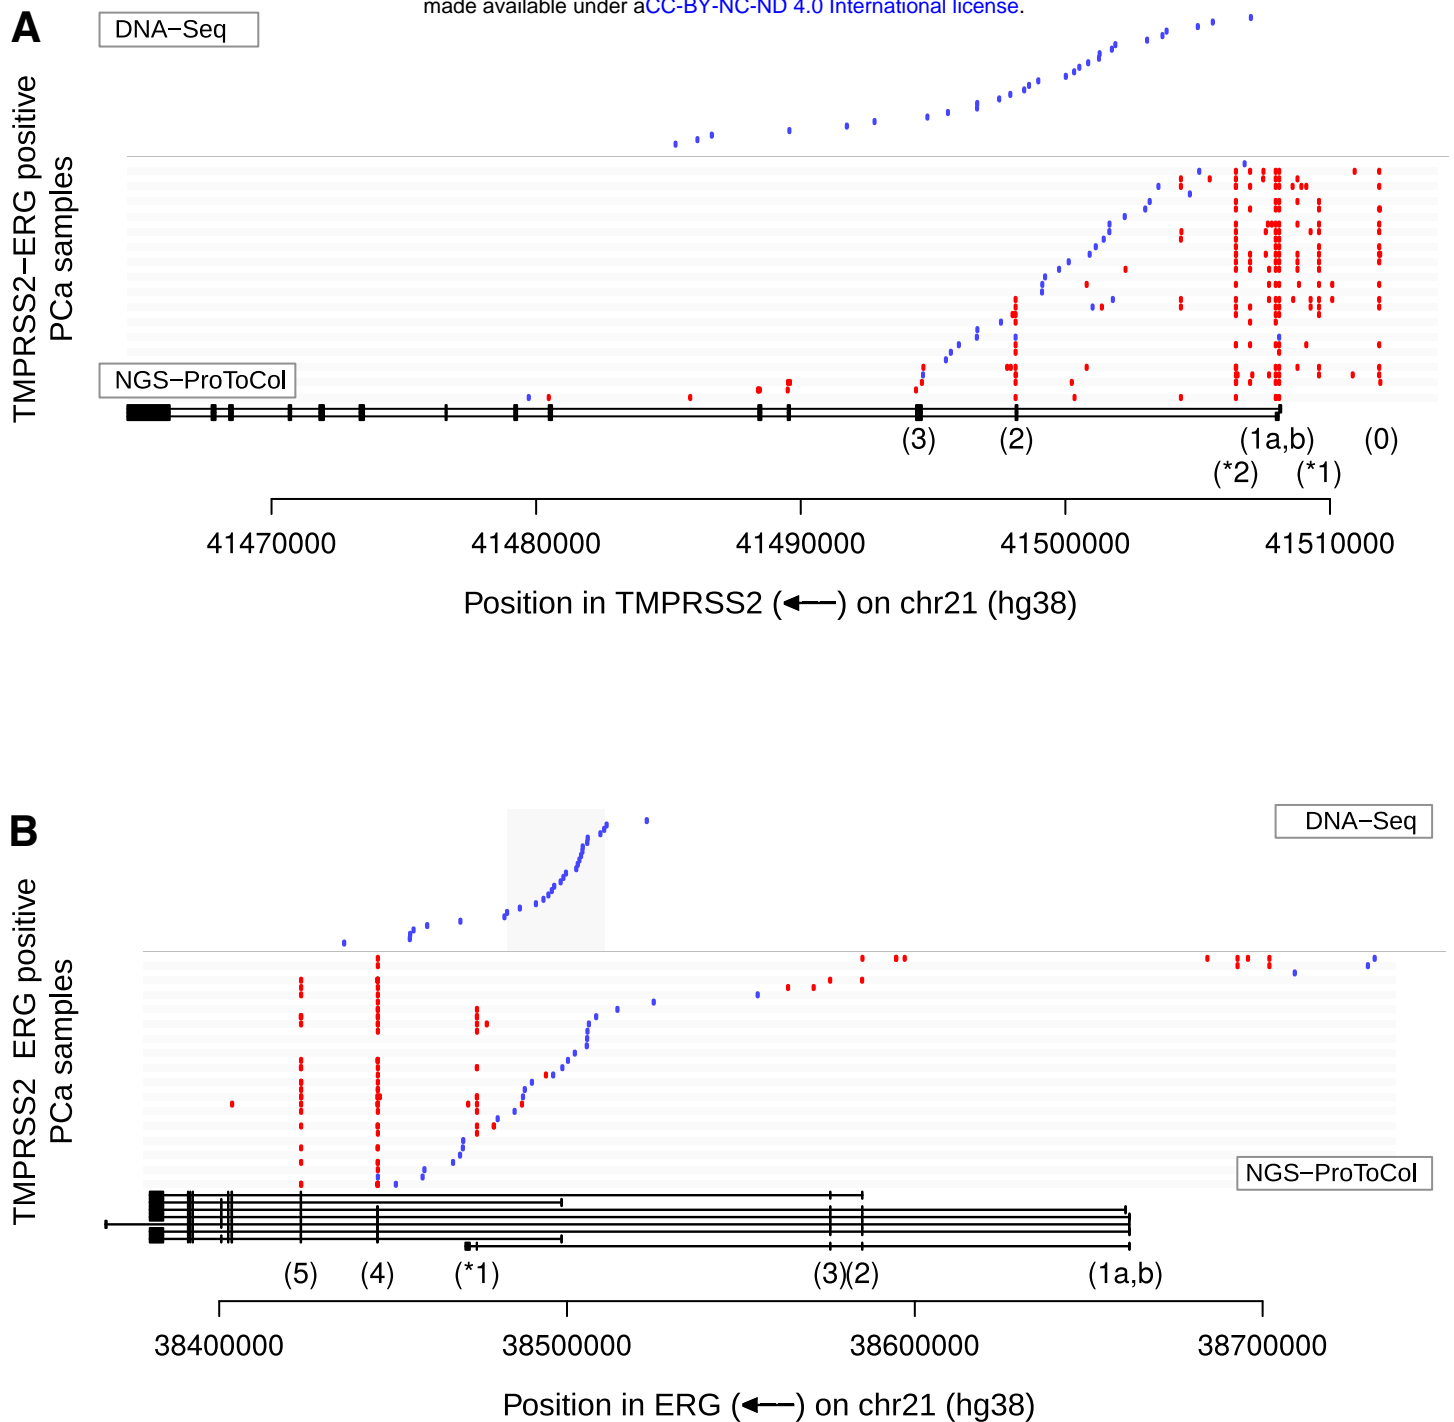

**Figure 6. TMAPRSS2-ERG junction map.** Summary of TMAPRSS2 and ERG junctions and breakpoints in NGS-ProToCol RNA-seq and non-matching targeted DNA-seq (Weier dataset). Gene structures are indicated at the bottom. Intronic Dr. Disco detected junctions (representing genomic breakpoints) and genomic breakpoints from the Weier dataset are indicated in blue and exonic junctions in red. (A) For TMAPRSS2, most breakpoints are detected after exon 1, up to exon 3. At mRNA level, apart from the first exons (1a and 1b), exon 0 and exon 2 were commonly included in fusion transcripts. Also, two novel recurrent cryptic exons (\*1 and \*2) were often observed in fusion transcripts. (B) In ERG we observe in the NGS-ProToCol data three samples (048, 054 & 075) that have their genomic breakpoints before ERG and result in transcripts with additional, novel, intergenic cryptic exons.

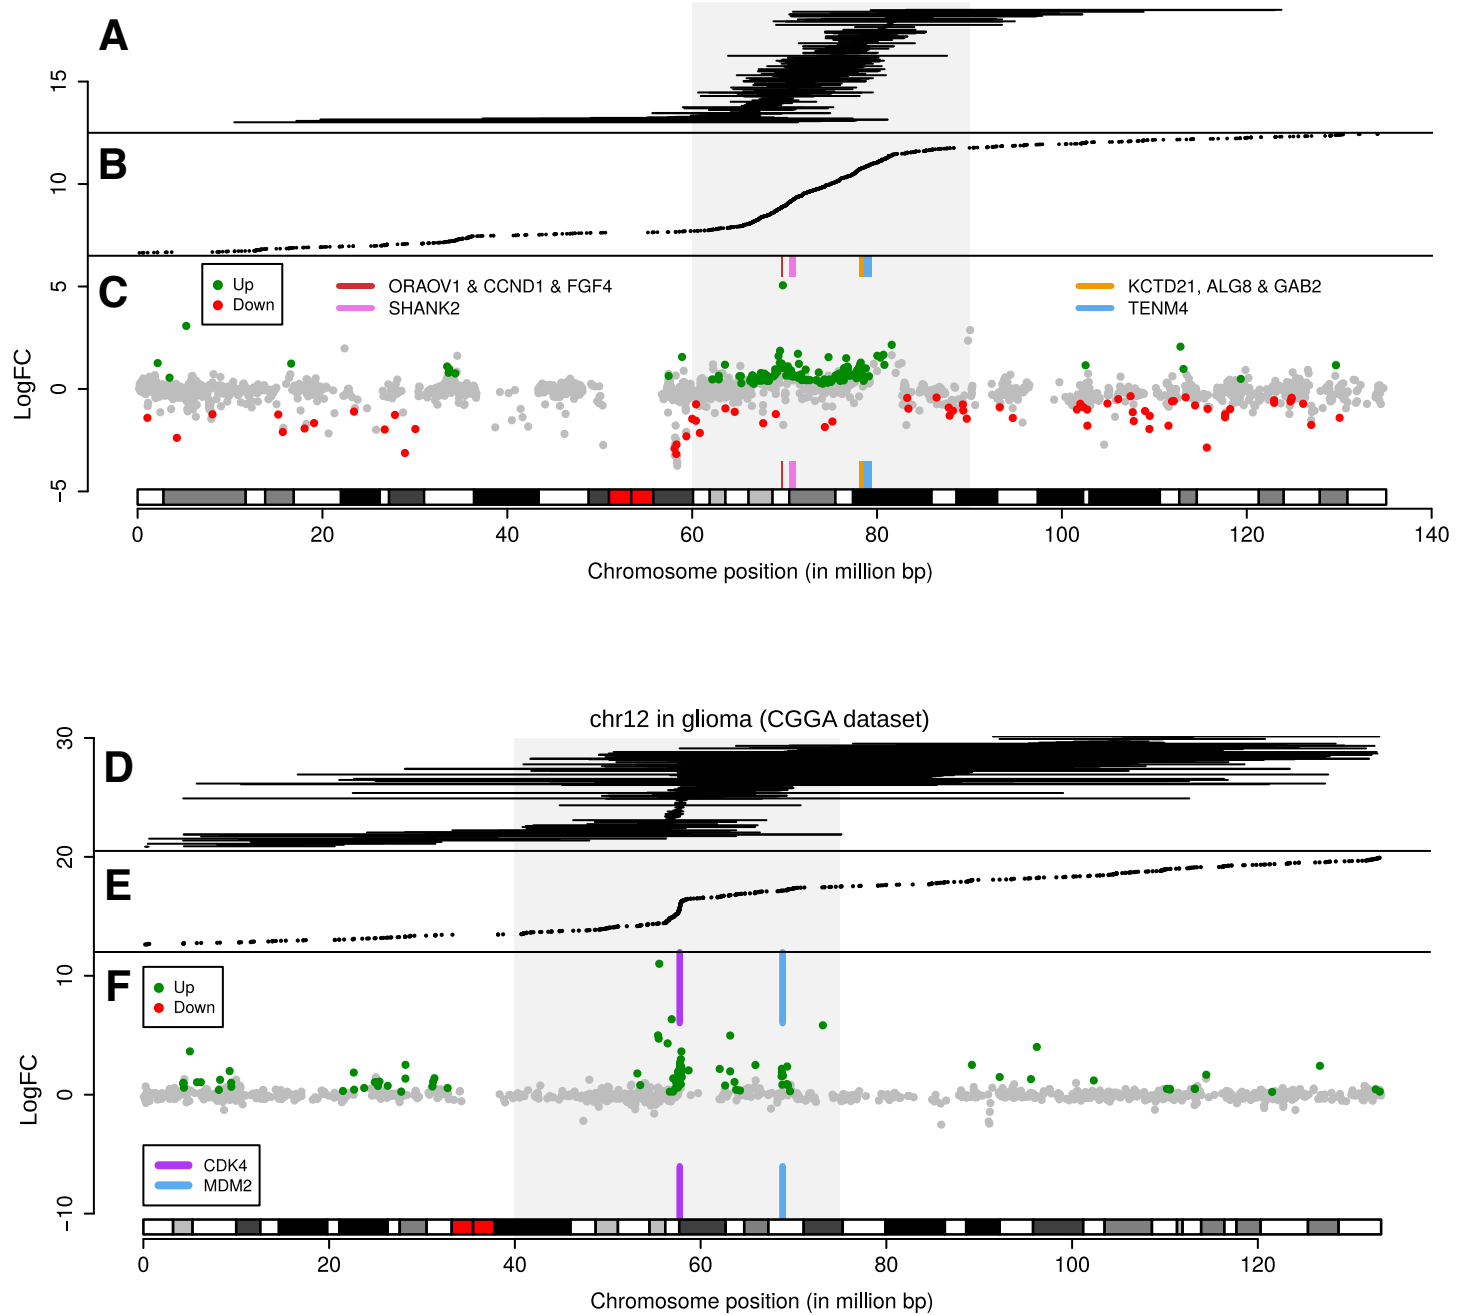

**Figure 7. Differential gene expression in junction hotspot regions.** (A-C) Overview of chr11 junctions, breakpoint positions and hotspot associated differential gene expression in BrCa, using RNA-seq data only. (A) Intrachromosomal junctions not marked as putative circRNA, indicated by horizontal lines. (B) Breakpoint positions from intronic and exonic, inter- and intrachromosomal junction. (C) Chromosomal differential expression plot for locus chr11:60,000,000-90,000,000 (grey square) with a q-value threshold of 0.001. Genes with the highest number of rearrangements, SHANK2 and TENM4, were illustrated with coloured boxes. Peaks in fold-change were observed surrounding ORAOV1, CCND1 & FGF4 and surrounding TENM4. (D-F) Overview of chr12 junctions, breakpoint positions and hotspot associated differential gene expression in glioma. (D) Intrachromosomal junctions not marked as putative circRNA are included. The breakpoint enriched region chr12:40,000,000-75,000,000 is indicated with a grey square. (E) Breakpoint positions from intronic and exonic, inter- and intrachromosomal junction not marked as putative circRNA are included. (F) Chromosomal differential expression plot for locus chr12:40,000,000-75,000,000 with a q-value threshold of 0.01. Peaks in fold change from up-regulated genes are found near CDK4 and MDM2.

**Table 1**

| Tissue type               | Data type                       | Samples             | Dataset      | Read depth (M)         | Stranded | Reference data  | Reference papers (PMID)      |
|---------------------------|---------------------------------|---------------------|--------------|------------------------|----------|-----------------|------------------------------|
| Prostate Cancer           | Ribo-minus RNA-Seq              | 41                  | NGS ProToCol | 70                     | yes      | EGAS00001002816 | 30735634                     |
| Normal Adjacent Prostate  | Ribo-minus RNA-Seq              | 51                  | NGS ProToCol | 70                     | yes      | EGAS00001002816 | 30735634                     |
| Colon Cancer              | Ribo-minus RNA-Seq              | 30                  | NGS ProToCol | 70                     | yes      | EGAS00001002854 | 31411736; 30735634; 29968252 |
| Colon Adenoma             | Ribo-minus RNA-Seq              | 30                  | NGS ProToCol | 70                     | yes      | EGAS00001002854 | 31411736; 30735634; 29968252 |
| Normal Adjacent Colon     | Ribo-minus RNA-Seq              | 18                  | NGS ProToCol | 70                     | yes      | EGAS00001002854 | 31411736; 30735634; 29968252 |
| Breast Cancer             | Ribo-minus RNA-Seq              | 289 (207 DNA match) | BASIS        | 150                    | yes      | EGAS00001001178 |                              |
| Prostate Cancer           | Ribo-minus RNA-Seq              | 6*                  | PCa-LINES    | 356 (dup) : 37 (dedup) | yes      | EGAD00001006366 |                              |
| Prostate Cancer           | Poly-A+ RNA-Seq                 | 7                   | PCa-LINES    | 50                     | no       | EGAS00001001476 | 28232859                     |
| Prostate Cancer (FFPE)    | Ribo-minus RNA-Seq              | 529                 | PCMM-FFPE    | 40                     | yes      | -               |                              |
| Glioma (various subtypes) | Ribo-minus RNA-Seq              | 274                 | CGGA         | 30                     | no       | GSE48865        | 25135958                     |
| Breast Cancer             | WG DNA-Seq                      | 560 (207 RNA match) | BASIS        |                        | 40       | EGAS00001001178 | 27135926                     |
| Prostate Cancer           | WG DNA-Seq (CG)                 |                     | 7 PCa-LINES  |                        | 100      | EGAS00001001476 | 23615946                     |
| Prostate Cancer           | DNA-Seq TMPRSS2-ERG breakpoints |                     | 29 Weier     |                        |          |                 | 23447416                     |

\*matching G-110 is NGS ProToCol 7046-004-052
